- 27 11. Department of Pediatrics, Puerta de Hierro-Majadahonda University Hospital, 28221  
28 Madrid, Spain
- 29 12. Departments of Pediatrics and Genetics, University of North Carolina, Chapel Hill, NC  
30 27599, USA
- 31 13. Department of Genome Sciences, University of Washington, Seattle, WA 98195, USA
- 32 14. Seattle Children's Hospital, Seattle, WA 98105, USA

33

34 **Corresponding author:**

35 **\*\*Michael J. Bamshad, MD**

36 Department of Pediatrics

37 University of Washington School of Medicine

38 Box 357371

39 1959 NE Pacific Street, HSB I607

40 Seattle, WA 98195

41 Phone: (206) 221-4131

42 FAX: (206) 221-3795

43 [mbamshad@uw.edu](mailto:mbamshad@uw.edu)

44

45 + These authors contributed equally

46

47 **Abstract**

48 Contraction of the human sarcomere is the result of interactions between myosin cross-bridges  
49 and actin filaments. Pathogenic variants in genes such as *MYH7*, *TPM1*, and *TNNI3* that  
50 encode parts of the cardiac sarcomere cause muscle diseases that affect the heart, such as  
51 dilated cardiomyopathy and hypertrophic cardiomyopathy. In contrast, pathogenic variants in  
52 homologous genes *MYH2*, *TPM2*, and *TNNI2*, that encode parts of the skeletal muscle  
53 sarcomere, cause muscle diseases affecting skeletal muscle, such as the distal arthrogyrosis  
54 (DA) syndromes and skeletal myopathies. To date, there have been few reports of genes (e.g.,  
55 *MYH7*) encoding sarcomeric proteins in which the same pathogenic variant affects both skeletal  
56 and cardiac muscle. Moreover, none of the known genes underlying DA have been found to  
57 contain mutations that also cause cardiac abnormalities. We report five families with DA due to  
58 heterozygous missense variants in the gene *actin, alpha, cardiac muscle 1 (ACTC1)*. *ACTC1*  
59 encodes a highly conserved actin that binds to myosin in both cardiac and skeletal muscle.  
60 Mutations in *ACTC1* have previously been found to underlie atrial septal defect, dilated  
61 cardiomyopathy, hypertrophic cardiomyopathy, and left ventricular noncompaction. Our  
62 discovery delineates a new DA condition due to mutations in *ACTC1* and suggests that some  
63 functions of *actin, alpha, cardiac muscle 1* are shared in cardiac and skeletal muscle.

64

65

66 **KEYWORDS**

67 exome sequencing; Mendelian disease; Mendelian disorder; congenital contractures; distal  
68 arthrogyrosis; cardiomyopathy; cardiac defect; molecular dynamics simulations

## 69 Introduction

70 Sarcomeres are the repeating functional units of muscle cells that are joined end-to-end  
71 to form skeletal and cardiac muscle fibers.<sup>1</sup> Sarcomeres consist of thick myosin filaments and  
72 thin actin filaments along with proteins such as troponin and tropomyosin that facilitate and  
73 regulate the interactions between the filaments.<sup>2</sup> Contractile force is generated when the myosin  
74 and actin filaments bind to form cross-bridges, which is thought to cause the filaments to slide  
75 against each other. The key sarcomeric proteins are encoded by highly conserved and  
76 homologous genes that typically express an isoform that is predominant in either cardiac or  
77 skeletal muscle. For example, *TNNI2*, *MYH3*, and *ACTA1* encode isoforms of troponin, myosin  
78 heavy chain, and alpha actin, respectively, that are primarily expressed in skeletal muscle while  
79 *TNNI3*, *MYH6*, and *ACTC1* encode isoforms that are primarily expressed in cardiac muscle.<sup>3</sup>

80 Pathogenic variants in genes that encode the skeletal sarcomeric proteins tropomyosin  
81 (*TPM2* [MIM: 190990]);<sup>4</sup> troponin I2, fast skeletal type (*TNNI2* [MIM: 191043]);<sup>4</sup> troponin T3, fast  
82 skeletal type (*TNNT3* [MIM: 600692]),<sup>5</sup> myosin heavy chain 3 (*MYH3* [MIM:160720]),<sup>6</sup> and  
83 myosin heavy chain 8 (*MYH8* [MIM: 160741])<sup>7</sup> account for most cases of distal arthrogryposis  
84 (DA), a group of Mendelian conditions characterized by non-progressive congenital contractures  
85 of the limbs, and less frequently, contractures of the face, ocular muscles, neck webbing,  
86 pterygia, short stature, and scoliosis. The precise pathogenesis of the contractures is unknown,  
87 although it has been proposed that pathogenic variants lead to perturbation of muscle  
88 contraction or relaxation, resulting in reduced limb movement in utero.<sup>8,9</sup> Several additional  
89 genes, specifically *PIEZO2* [MIM: 613629],<sup>10,11</sup> *ECEL1* [MIM: 605896],<sup>12,13</sup> and *FBN2* [MIM:  
90 612570],<sup>14</sup> that underlie other forms of DA encode proteins that are less directly involved in  
91 sarcomere contraction.

92 To date, the vast majority of variants in genes encoding homologous components of the  
93 cardiac sarcomere have been found to result in conditions in which only cardiac muscle is  
94 affected, including cardiomyopathy and structural heart defects. Herein, we report five families

95 with DA and congenital heart defects due to heterozygous missense variants in the gene *actin*,  
96 *alpha, cardiac muscle 1 (ACTC1)*. *ACTC1* encodes a highly conserved actin that binds to  
97 myosin in both cardiac and skeletal muscle. We employ molecular dynamics (MD) simulations  
98 of wild type (WT) and mutant cardiac actin to predict the structural and functional consequences  
99 of these variants.

100  
101  
102

## Methods

### *Exome Sequencing, Annotation, and Filtering*

104 From a cohort of 463 families (1,582 individuals) with multiple congenital contractures,  
105 we selected 172 families, in which pathogenic or likely pathogenic variants had not been  
106 identified, for exome sequencing (ES). All studies were approved by the institutional review  
107 boards of the University of Washington and Seattle Children's Hospital and informed consent  
108 was obtained from each participant or their parents to participate in this study and this  
109 publication. ES, annotation, and analysis were performed by the University of Washington  
110 Center for Mendelian Genomics (now the University of Washington Center for Rare Disease  
111 Research) as described previously.<sup>15</sup> Briefly, variants were called by GATK v3.7  
112 HaplotypeCaller and annotated with Variant Effect Predictor v95.3.<sup>16</sup> Variants were filtered using  
113 GEMINI v0.30.1<sup>17</sup> for genotype call quality ( $GQ \geq 20$ ), read depth ( $\geq 6$ ), allele frequency in  
114 population controls (i.e., maximum frequency in any continental superpopulation in gnomAD<sup>18</sup>  
115 v2.1 and v3.0 exomes and genomes  $< 0.005$ ), consistency with the mode of inheritance in each  
116 family, and predicted impact on protein-coding sequence (e.g. annotated as missense,  
117 nonsense, canonical splice, or coding indel).

118

### *Molecular Dynamics - Model Preparation and Simulation*

120 Initial coordinates for cardiac globular (g-actin) structures were generated via homology  
121 to an X-ray crystal structure of rabbit skeletal actin (UniProt Entry P68135) downloaded from the

122 Protein Data Bank<sup>19</sup> (PDB, [www.rcsb.org](http://www.rcsb.org) ID 3HBT)<sup>20</sup>. 3HBT is a model of g-actin complexed  
123 with ATP, CA, and SO4. The human ACTC1 sequence was downloaded from UniProt (Entry  
124 P68032). The human and rabbit sequences were 98.9 % identical, assessed using *Clustal*  
125 *Omega*<sup>21</sup> and there were four conservative amino acid substitutions ([human amino acid, human  
126 residue number, rabbit amino acid as follows]: D2E, E3D, L301M, and S360T). Homology  
127 models of the human wild type (WT) and four mutant (p.Thr68Asn, p.Arg185Trp, p.Gly199Ser,  
128 p.Arg374Ser) structures were generated using *Modeller*<sup>22</sup>, which introduced the amino acid  
129 substitutions and built coordinates for atoms not present in the PDB file (no coordinates were  
130 present for D-loop residues 40-50 in 3HBT). The p.Arg374His variant was not simulated due to  
131 the expected overlap with p.Arg374Ser and because the change to His is more conservative  
132 than the change to Ser. For p.Gly199Ser, the initial backbone dihedral ( $\phi, \psi$ ) angles for Gly were  
133 ( $152^\circ, -16^\circ$ ), which are unfavorable for Ser. Consequently, this loop was further refined and the  
134 initial S199 dihedrals were ( $-177^\circ, -14^\circ$ ). During modelling, crystallographic waters and the SO4  
135 were removed, ATP was retained, and Ca<sup>2+</sup> was replaced by Mg<sup>2+</sup>. Initial coordinates for  
136 cardiac filamentous (f-actin) pentamer structures were generated using an electron microscopy  
137 structure of mouse tropomyosin and rabbit skeletal actin (PDB ID: 3J8A).<sup>23</sup> The tropomyosin  
138 chains were removed and the f-actin pentamers complexed with ADP and Mg<sup>2+</sup> were used to  
139 construct homology models of WT and p.Thr68Asn human cardiac F-actin with *Modeller*. After  
140 homology models were built, hydrogen atoms were modeled onto the initial structure using the  
141 *tLeap* module of AMBER and each protein was solvated with explicit water molecules in a  
142 periodic, truncated octahedral box that extended 10 Å beyond any protein atom. Na<sup>+</sup>  
143 counterions were added to neutralize the systems.

144 All simulations were performed with the AMBER20 package<sup>24,25</sup> and the ff14SB force  
145 field<sup>26</sup> using standard procedures. Water molecules were treated with the TIP3P force field.<sup>27</sup>  
146 Metal ions were modeled using the Li and Merz parameter set.<sup>28-30</sup> ATP and ADP molecules  
147 were treated with parameters from Meagher et al.<sup>31</sup> The SHAKE algorithm was used to

148 constrain the motion of hydrogen-containing bonds. Long-range electrostatic interactions were  
149 calculated using the particle mesh Ewald (PME) method. Each system was minimized in for  
150 10000 steps divided across three stages in which restraints were placed either on hydrogen  
151 atoms, solvent atoms, or all backbone heavy atoms ( $C_{\alpha}$ , C, N, O atoms). After minimization,  
152 systems were heated to 310 K over 300 ps using the canonical NVT (constant number of  
153 particles, volume, and temperature) ensemble. During all heating stages, 25 kcal mol<sup>-1</sup>  
154 restraints were present on the backbone heavy atoms ( $C_{\alpha}$ , C, N, O atoms). After the system  
155 temperatures reached 310 K, the systems were equilibrated for 5.4 ns over 5 successive stages  
156 using the NPT (constant number of particles, pressure, and temperature) ensemble. During  
157 equilibration, restraints on backbone atoms were decreased from 25 kcal mol<sup>-1</sup> during the first  
158 stage to 1 kcal mol<sup>-1</sup> during the fourth stage. During the final equilibration stage, the systems  
159 were equilibrated in the absence of restraints. Production dynamics for conventional molecular  
160 dynamics (cMD) simulations were then performed using the NVT ensemble using an 8 Å  
161 nonbonded cutoff, a 2 fs time step, and coordinates were saved every picosecond. G-actin cMD  
162 simulations were run in triplicate each replicate simulation was 500 ns long. We used an  
163 enhanced sampling scheme called Gaussian accelerated MD (GaMD)<sup>32</sup> to explore  
164 conformational sampling in the WT and p.Thr68Asn F-actin pentamer models. GaMD production  
165 runs were preceded by a 52 ns long GaMD equilibration period in which boost potentials were  
166 added. The upper limits of the standard deviation of the boost potentials were set to 6 kcal mol<sup>-1</sup>.  
167 Neither the standard 5.2 ns equilibration nor the 52 ns GaMD equilibration contributed to the  
168 length of the production dynamics for any simulation. Production dynamics for Gaussian  
169 accelerated (GaMD) simulations were using the NVT ensemble using an 8 Å nonbonded cutoff,  
170 a 2 fs time step, and coordinates were saved every picosecond. Single replicates of the WT and  
171 p.Thr68Asn were performed and each simulation was 300 ns long. Unless specified otherwise,  
172 simulations were analyzed separately, and the results of replicate simulations were averaged  
173 together.

174

## 175 *Molecular Dynamics - Analysis*

176 The C<sub>α</sub> root-mean-squared deviation (RMSD), C<sub>α</sub> root-mean-squared fluctuation (RMSF),  
177 solvent accessible surface area (SASA), secondary structure content, inter-atomic distances,  
178 and inter-residue contacts were calculated with *cpptraj*.<sup>33</sup> The C<sub>α</sub> RMSD was calculated after  
179 alignment of all C<sub>α</sub> atoms to the minimized structure. The C<sub>α</sub> RMSF was calculated about  
180 average MD structures for each simulation. For each timepoint in the simulation, two residues  
181 were considered in contact with one another if at least one pair of heavy atoms were within 5 Å  
182 of one another. Then we recorded the average percent simulation time each residue pair was in  
183 contact for each simulation. A student's t-test was used to identify statistically significant (p <  
184 0.05) differences in inter-residue contact times between the WT and mutant simulations. All  
185 protein images were prepared using *UCSF Chimera*<sup>34,35</sup>.

186

## 187 **Results**

188 After variant filtration of the exome data, three families had compelling candidate  
189 variants in the same candidate gene, *ACTC1*, or *actin, alpha, cardiac muscle (ACTC1* [MIM  
190 102540; Refseq accession NM\_005159.4]) (Table 1; Figure 1; Figure S1). Specifically, each  
191 family had a heterozygous candidate missense variant that was either *de novo* or segregated in  
192 an autosomal dominant pattern. In Family A, comprised of an affected father and affected  
193 daughter with camptodactyly of the fingers, hypoplastic flexion creases, clubfoot, webbed neck,  
194 scoliosis, hip contractures, and ventriculoseptal defect, a heterozygous variant in *ACTC1*  
195 (c.595G>A, p.Gly199Ser) was identified. This family was previously described (Family D in <sup>36</sup>)  
196 as possibly having autosomal dominant multiple pterygium syndrome (MIM 178110), but no  
197 likely pathogenic or pathogenic variants in *MYH3* were identified. In Family B, an affected  
198 mother and affected daughter with knee contractures, clubfoot, limited neck rotation, scoliosis,  
199 and hip contractures, were heterozygous for c.1120C>A, p.Arg374Ser. The grandmother in



200 Family B was described as having similar clinical findings but no medical records or  
201 photographs were available. Family C, the third family, was a simplex family in which a *de novo*  
202 variant c.203C>A, p.Thr68Asn was identified in the proband with clubfoot, camptodactyly of the  
203 toes and fingers, webbed neck, and an atrial septal defect. Upon follow up with Family C  
204 approximately twenty years after they were originally enrolled, the proband was found to have a  
205 son who had camptodactyly of the fingers, overlapping toes, elbow contractures, elbow  
206 webbing, and an atrial septal defect. Her son was heterozygous for the c.203C>A, p.Thr68Asn  
207 variant.

208 Two additional simplex families (Families D and E) subsequently came to our attention  
209 via direct clinician referral after clinical testing identified *ACTC1* as a candidate gene. Each had  
210 a *de novo* variant, c.553C>T, p.Arg185Trp in Family D, and c.1121G>A, p.Arg374His in Family  
211 E. Notably the variants in Family B and E perturbed the same residue. The proband of Family D  
212 had short stature, clubfoot, knee and elbow contractures, hypoplastic flexion creases, atrial  
213 septal defect, and ventricular septal defect. No muscle weakness was noted. An  
214 echocardiogram found borderline left ventricular systolic function with an ejection fraction of  
215 52% and reduced longitudinal strain in the basal wall segments. Electron microscopy and  
216 immunohistochemistry of a skeletal muscle biopsy revealed possible nemaline bodies (Figure  
217 S2) and presence of rare myofibers with central core but no ragged red fibers or rod-like  
218 inclusions. The proband in Family E was stillborn at 38+3 weeks. At 31 weeks, ultrasound  
219 findings included hydrops fetalis, hydrothrorax, small lower jaw, ductus venosus agenesis, and  
220 positioning of the extremities consistent with fetal akinesia. No additional clinical information  
221 was available.

222 In summary, at least one affected individual in each family was reported to have a  
223 combination of camptodactyly of the fingers or toes, hypoplastic flexion creases, clubfoot,  
224 limited neck rotation, scoliosis (excluding Family E, for which only fetal ultrasound was  
225 available), and hip contractures. Common facial features included microretrognathia, ptosis,

226 downslanting palpebral fissures, low-set ears, and a long nasal bridge (Figure 1). Ventricular or  
227 atrial septal defects were reported in families A, C, and D while E had ductus venosus agenesis  
228 in utero, but only one affected individual, the proband in D, had cardiomyopathy. The co-  
229 occurrence of these congenital heart defects is notable because *ACTC1* is well-established to  
230 underlie isolated cardiac abnormalities including dilated and hypertrophic cardiomyopathy (MIM  
231 613424, 612098), atrial septal defects (MIM 612794), and left ventricular noncompaction (MIM  
232 613424). However, *ACTC1* has not been reported to underlie a multiple malformation syndrome  
233 that affects multiple organ syndromes.

234 CADD (v1.6)<sup>37</sup> scores >20.0 indicate that all five variants are predicted to be pathogenic  
235 (Table 1). For all five of these variants, the homologous residues in ACTA1 have been  
236 reported<sup>38-43</sup> to be perturbed in infants with autosomal dominant severe congenital nemaline  
237 myopathy (Figure 2) leading to death before one year of age, an observation that further  
238 suggests these residues play a critical role in sarcomere function. In addition, these variants  
239 were either absent or exceedingly rare in gnomAD v2.1.1 or v3.1.2. p.Arg185Trp was  
240 heterozygous in a single individual in gnomAD and was the only variant that has been  
241 previously reported in ClinVar (twice classified as “likely pathogenic”). One of these ClinVar  
242 entries (SCV000742090.2) reports that p.Arg185Trp was found in an individual with  
243 “arthrogryposis multiplex congenita, multiple suture craniosynostosis, high palate, cleft uvula,  
244 pulmonary hypoplasia, bronchomalacia, pulmonary arterial hypertension, hydrocephalus,  
245 cryptorchidism, penile hypospadias, dysphagia, secundum atrial septal defect, patent foramen  
246 ovale, shallow orbits, infra-orbital crease, microretrognathia, webbed neck, short neck.” These  
247 clinical findings suggest that this individual likely has the same condition we describe herein.

248

#### 249 *Mutation-associated changes in the overall conformation and dynamics of g-actin*

250 We first analyzed the conformations sampled by WT and mutant g-actin to determine  
251 whether four of the variants we identified (Figure 3A) led to large-scale conformational changes

252 within actin monomers. We calculated the  $C_{\alpha}$  root-mean-squared deviation ( $C_{\alpha}$  RMSD, a  
253 measure of structural similarity) of each frame in the simulation to the minimized structure. The  
254 overall conformation of the actin monomers was preserved despite introduction of each  
255 mutation. In fact, the mutant simulations all had smaller  $C_{\alpha}$  RMSD values than the WT  
256 simulations, indicating that the mutations dampened structural fluctuations in g-actin. All  
257 simulated systems had an average  $C_{\alpha}$  root-mean-squared deviation (a measure of structural  
258 similarity) less than 2.6 Å to the crystallographic conformation (Table 2, WT: 2.6 Å,  
259 p.p.Thr68Asn: 2.0 Å test statistic=5.09,  $p=0.007$ , p.Gly199Ser, p.Arg185Trp: 2.4 Å test  
260 statistic=2.00,  $p=0.12$ , p.Gly199Ser: 2.4 Å test statistic=1.14,  $p=0.32$ , p.Arg374Ser: 2.2 Å test  
261 statistic=5.33,  $p=0.006$ ; p-values denote statistical differences in the average RMSD values of  
262 the WT simulations versus each mutant).The largest amplitude structural change was a  
263 breathing motion in which relative scissoring of SD2 and SD4 opened and closed the nucleotide  
264 binding pocket, which occurred in all simulations. We next measured the  $C_{\alpha}$  root-mean-squared  
265 fluctuations ( $C_{\alpha}$  RMSF) and compared them with the WT simulations (Figure S3). The majority  
266 of residues in g-actin had small ( $< 1$  Å)  $C_{\alpha}$  fluctuations about their average positions. The  
267 regions with the greatest fluctuations were the DNase1 binding loop (aka the D-loop, residues  
268 41-56) and two loops in SD4 (residues 199-204, 219-224). The flexibilities of most residues  
269 were not affected by the mutations. However, all four mutations led to a decrease in the  $C_{\alpha}$   
270 RMSF of residues in the D-loop (Figure S3), and statistically significant (residues with significant  
271 differences denoted in Figure S3) decreases in the  $C_{\alpha}$  RMSF of D-loop residues were observed  
272 for p.Thr68Asn, p.Arg185Trp, and p.Gly199Ser. Each of the mutations also caused low  
273 magnitude ( $< 0.5$  Å) but statistically significant (residues with significant differences denoted in  
274 Figure S3) (p value and test) changes in  $C_{\alpha}$  RMSF among residues near the mutation sites.

275

276 *p.Thr68Asn modified the structural organization of subdomain 2 and the D-loop*

277           The RMSD and RMSF data indicated substantial changes in the dynamics of the D-loop  
278 in the presence of all four simulated mutations. Therefore, we examined the dynamics in this  
279 region in greater detail with an emphasis on the p.Thr68Asn mutation, as T68 is located within  
280 SD2 and closest structurally to the D-loop. Mutation of Thr to Asn (p.Thr68Asn) is somewhat  
281 conservative: both residues have polar side chains; however, the Asn side chain is long  
282 whereas Thr branches at C<sub>β</sub>. The alternate conformations accessible to Asn led to a cascade of  
283 changes in amino acid interactions among neighboring residues in SD2 (Figure 4A-C). The  
284 changes in contacts affected interactions made by D-loop residues as well as a complex salt  
285 bridge formed between residues 39, 70, and 83. p.Thr68Asn increased the extent to which  
286 residues in the D-loop formed  $\alpha$ -helix secondary structure (Figure 4B, D). p.Thr68Asn  
287 decreased the overall solvent accessible surface area (SASA) of residues in the D-loop relative  
288 to the WT simulations (Figure 4E). The net effect of the structural changes induced by  
289 p.Thr68Asn shifted the structure and dynamic behavior of SD2 such that the mutant SD2  
290 adopted a more compact and less flexible conformation relative to WT.

291           These effects were most pronounced for p.Thr68Asn but was also observed for the other  
292 mutants. The greater effect of p.Thr68Asn was likely due to its central position in SD2. Altered  
293 structure and dynamics among D-loop residues were also observed for the p.Gly199Ser,  
294 p.Arg185Trp, and p.Arg374Ser simulations (Figure S4-6). All mutations altered inter-residue  
295 interactions formed by D-loop residues and other SD2 residues (Figure S4). All mutations  
296 increased the extent to which residues in the D-loop formed  $\alpha$ -helix secondary structure in the  
297 ensemble average (p.Arg374Ser > p.Arg185Trp > p.Gly199Ser > p.Thr68Asn > WT, Figure S5).  
298 However, there was not a statistically meaningful change in the net amount of  $\alpha$ -helix formed  
299 and this region did form an enduring  $\alpha$ -helix in one of the WT simulations. All mutations  
300 decreased the average D-loop SASA (WT (1375 Å<sup>2</sup>) > p.Arg374Ser (1349 Å<sup>2</sup>, t-statistic = 0.70,  
301 p-value = 0.52) > p.Gly199Ser (1335 Å<sup>2</sup>, t-statistic = 1.47, p-value = 0.21) > p.Arg185Trp (1325  
302 Å<sup>2</sup>, t-statistic = 3.30, p-value = 0.03) > p.Thr68Asn (1294 Å<sup>2</sup>, t-statistic = 3.53, p-value = 0.02),

303 Figure S6). We analyzed statistically significant (Figures S4 and 4; Table S2) changes in  
304 residue-residue contact networks to identify structural pathways by which the mutants altered  
305 SD2 dynamics (Figure 5, Table S2). Altered residue-residue interactions were only considered  
306 in this analysis if there was at least a 10% difference in the average contact time frequency  
307 between the WT and mutant simulations. The extent to which the mutations altered residue-  
308 residue interaction networks was variable. Disruption was greatest for the p.Arg185Trp mutation  
309 and the p.Gly199Ser mutation was the least impactful. p.Thr68Asn modified local residue-  
310 residue interactions to affect change in SD2 and the D-loop. p.Arg185Trp, p.Gly199Ser, and  
311 p.Arg374Ser instead introduced structural changes that propagated through SD4 and/or SD2  
312 before ultimately altering SD2 structure (Figure 5, SI, Table S2). Though operating through  
313 distinct mechanisms, all *ACTC1* mutations simulated in this study led to a common change in  
314 the structure and dynamics of SD2 and the D-loop.

315

#### 316 *p.Thr68Asn modified interactions between actin subunits in f-actin*

317 In our g-actin simulations, all mutations led to similar structural changes in SD2 and the  
318 D-loop. To make predictions about the effects of altered SD2 structure/dynamics in actin  
319 filaments, we performed MD simulations of WT and p.Thr68Asn cardiac f-actin pentamers  
320 (Figure 3B). Simulation performance rapidly decreases with the number of atoms; therefore, we  
321 simulated pentamers as a simplified proxy for actin filaments and only analyzed the dynamics of  
322 the central chain (chain C) to avoid end effects. f-actin filaments are composed of two proto-  
323 fibrils, each of which contains monomers arranged such that SD3 of one monomer is inserted  
324 into the cleft between SD2 and SD4 of the succeeding monomer (moving from the – to + end).  
325 Two protofilaments twist around one another and the face of the monomer containing the  
326 mutations (the front facing side in Figure 3B) is buried. SD2 is a critical structural component of  
327 actin filaments: it forms interactions between actins within a single protofilament (intra-filament)  
328 and between monomers of different protofilaments (inter-filament). For example, in the cryoEM

329 structure, the D-loop of one monomer encircles Y171 of the succeeding monomer in the same  
330 protofilament (in our model, the D-loop of chain C loops around Y171 of chain A). Additionally,  
331 R41 forms a salt bridge with E272 of a monomer in the opposite protofilament. In GaMD  
332 simulations of f-actin, the p.Thr68Asn resulted in a shift in the structure and dynamics of SD2  
333 and the D-loop (Figure 6). The mutation resulted in a change in residue-residue interactions  
334 made by the D-loop (Figure 6A) and reduced the number of contacts made between SD2 of  
335 chain C and atoms in other actin subunits (Figure 6B). As was observed in the g-actin  
336 simulations, p.Thr68Asn promoted a more compact conformation of the D-loop in f-actin (Figure  
337 6C). The more compact loop conformation reduced interactions between the D-loop of chain C  
338 and Y171 of chain A and also eliminated the salt bridge formed between R41 of chain C and  
339 E272 of chain B (Figure 6D,E).

340

## 341 **Discussion**

342 We identified five unrelated families in which a total of eight individuals have  
343 heterozygous, rare, pathogenic variants in *ACTC1* and share similar phenotypic effects  
344 including multiple congenital contractures, neck pterygia, scoliosis, and congenital heart  
345 defects/cardiomyopathy. This pattern of clinical findings appears to represent an autosomal  
346 dominant disorder distinct from previously reported Mendelian conditions due to *ACTC1* variants  
347 that are characterized by cardiac abnormalities including autosomal dominant atrial septal  
348 defects [MIM 612794],<sup>44</sup> dilated cardiomyopathy [MIM 613424],<sup>45</sup> hypertrophic cardiomyopathy  
349 [MIM 612098],<sup>46</sup> and left ventricular noncompaction [MIM 613424]<sup>47</sup>). MD simulations  
350 demonstrate that all four variants (p.Thr68Asn, p.Arg185Trp, G19S, and p.Arg374Ser) disrupt  
351 the native structure of the regions of actin most associated with protein-protein interactions  
352 (subdomain 2, or SD2, and the D-loop), impeding interactions between actin and its binding  
353 partners, including other actins during thin filament assembly. Additionally, the altered D-loop  
354 structure is predicted to increase structural disorder within thin filaments, resulting in 'stretchier'

355 thin filaments that may contract more slowly, require greater loads to extend, have weakened  
356 force production, and/or have slower rates of force production. Structural perturbations to the D-  
357 loop are known to affect thin filament stiffness.<sup>48,49</sup> Thus, while the genetic basis of this DA  
358 condition is unique compared to other DAs, the underlying mechanisms may be similar if not  
359 identical.<sup>9,15,50–52</sup>

360 All of the pathogenic *ACTC1* variants (n = 87) reported to date (Table S1), with the  
361 exception of p.Arg185Trp that we also identified in Family D, were found in persons noted only  
362 to have abnormalities of the heart. While it is possible that congenital contractures have been  
363 overlooked in these families, this seems like an unlikely explanation for all or even most  
364 families. Alternatively, there may be a biological explanation(s) for this observation, none of  
365 which are mutually exclusive. First, none of the residues perturbed in the families we identified,  
366 except for Arg185 which was previously found in a person with congenital contractures, have  
367 been reported previously. So, the distribution of phenotypic effects associated with these  
368 genotypes has been, to date, unknown. Second, substitutions of each of these residues in  
369 *ACTC1* increases disorder of actin SD2 and D-loop interactions, and these perturbations could  
370 be a unique consequence of contracture-associated variants. Third, the presence of a  
371 pathogenic *ACTC1* variant may be necessary but not sufficient for the development of  
372 congenital contractures. In other words, skeletal muscle might be affected only in the presence  
373 of genetic modifier(s). We verified the absence of additional rare coding *ACTC1* or *ACTA1*  
374 variants but could not exclude the presence of structural variants and/or variants in non-coding  
375 regulatory elements that might alter expression of *ACTC1* or *ACTA1*.

376 The observation that rare genotypes in *ACTC1* underlie both cardiac and skeletal  
377 abnormalities is not without precedent. *ACTC1* and *ACTA1* are highly homologous, differing by  
378 only four amino acids (Figure 2), and both actins are expressed in skeletal and cardiac  
379 muscle.<sup>53–56</sup> During fetal development, *ACTC1* is the predominant actin, as measured by protein  
380 expression, in both skeletal and cardiac muscle.<sup>55</sup> It is downregulated starting around 27-28



381 weeks of fetal development and continues to decline until ~6 months of age when it accounts for  
382 ~5% of total actin.<sup>55</sup> In adult skeletal muscle ACTC1 and ACTA1 account for ~5% and 95% of  
383 actin, respectively,<sup>55</sup> and ACTC1 accounts for ~80% of actin in adult cardiac muscle.<sup>53</sup> These  
384 differences in spatial and temporal expression are considered explanations of the exclusive  
385 association of skeletal muscle abnormalities (i.e., nemaline myopathy [MIM 161800], actin  
386 accumulation myopathy [MIM 161800], congenital fiber-type disproportion [MIM 255310],  
387 intranuclear rod myopathy [MIM 161800], etc.) with *ACTA1* mutations and cardiac abnormalities  
388 (autosomal dominant atrial septal defects [MIM 612794],<sup>44</sup> dilated [MIM 613424]<sup>45</sup> and  
389 hypertrophic [MIM 612098]<sup>46</sup> cardiomyopathy, and left ventricular noncompaction [MIM  
390 613424]<sup>47</sup>) with mutations in *ACTC1*. Of the hundreds of individuals described with *ACTA1*-  
391 associated myopathy, only twelve (nine unique variants)<sup>57-65</sup> have been reported to also have a  
392 cardiac abnormality (Table S1), either in conjunction with a skeletal myopathy (N=10) or alone  
393 (N=2). Rare variants in *ACTC1* resulting in congenital contractures in a small fraction of persons  
394 with *ACTC1* variants appears to be the corollary.

395 Mutations in *ACTC1* result in skeletal muscle contractures even though ACTC1 accounts  
396 for only ~5% of total actin in adult skeletal muscle.<sup>53</sup> The most likely explanation is that the  
397 skeletal muscle contractures originate during fetal development when ACTC1 is the  
398 predominant source of sarcomeric actin, and replacement of most skeletal muscle actin with  
399 wildtype ACTA1 during infancy is insufficient to correct the abnormality. However, it is possible  
400 that *ACTC1* has a previously unknown function in skeletal muscle biology, or that mutant  
401 ACTC1 protein interferes with the function of actin encoded by *ACTA1*. Testing this hypothesis  
402 will require further functional characterization of these variants.

403 The MD simulations are limited by several factors. First and foremost, the method used  
404 to introduce mutations assumes that the mutant constructs can access WT-like conformations  
405 and the timescale along which they transition from a WT-like ensemble to a mutant ensemble  
406 are not known. Second, our simulations have probed isolated states of g-actin and f-actin and



407 cannot directly describe effects that the mutations have on interactions between g-actin and its  
408 binding partners nor between f-actin and the rest of the contractile machinery present in  
409 sarcomeres. Nevertheless, these simulations provide predictions about the functional  
410 consequences of DA-associated mutations in *ACTC1* generate hypotheses on disease  
411 mechanisms and provide guidance for future studies such as investigation of whether the  
412 mutations result in impaired filament assembly or impaired filament mechanics.

413 In summary, we identified five unrelated families with heterozygous pathogenic variants  
414 in *ACTC1* resulting in multiple congenital contractures, webbed neck, scoliosis, short stature,  
415 and distinctive facial features as well as cardiac abnormalities including atrial and ventricular  
416 septal defects, left ventricular noncompaction, cardiomyopathy. This appears to be a novel  
417 Mendelian condition due to pathogenic variants in a gene known to underlie conditions  
418 characterized only by cardiac defects. Our findings suggest both that persons with multiple  
419 congenital contractures should be tested for pathogenic variants in *ACTC1* and persons with  
420 contractures and pathogenic variants in *ACTC1* should undergo cardiac evaluation for both  
421 structural and functional abnormalities.

422

### 423 **Supplemental Information**

424 Supplemental Information include 6 figures, 1 table, and detailed description of MD simulation  
425 results.

426

### 427 **Data and Code Availability**

428 Sequence data for Families A is in dbGaP under accession number phs000693 and B and C will  
429 be available in the AnVIL under accession number phs003047 pending the first public release of  
430 the GREGoR dataset. Please contact the corresponding author M.J.B for further information.

431

### 432 **Declaration of Interests**

433 MJB and JXC are the Editor-in-Chief and Deputy Editor of *HGG Advances* and were recused  
434 from the editorial handling of this manuscript. All other authors declare no competing interests.

435

#### 436 **Acknowledgements**

437 We thank the families for their participation and support. Sequencing and data analysis were  
438 provided by the University of Washington Center for Rare Disease Research (UW-CRDR) with  
439 support from NHGRI grants U01 HG011744, UM1 HG006493 and U24 HG011746. Protein  
440 simulations were performed with resources provided by the UW Center for Translational Muscle  
441 Research (PI, Regnier), which is supported by the National Institute of Arthritis and  
442 Musculoskeletal and Skin Diseases of the National Institutes of Health under Award Number  
443 P30AR074990. Additional funding support for MR and MCC was provided by NIH RM1  
444 GM131981. This work was also funded by the National Institute of Child Health and Human  
445 Development (4R01HD048895 to M.J.B.), and a Cardiovascular Research Training Grant from  
446 the National Heart, Lung, and Blood Institute (T32HL007828 to M.C.C.). The content is solely  
447 the responsibility of the authors and does not necessarily represent the official views of the  
448 National Institutes of Health.

449

#### 450 **Web resources**

451 The URLs for data presented herein are as follows:

452 MyGene2: <https://mygene2.org>

453 Geno2MP: <https://geno2mp.gs.washington.edu/Geno2MP/>

454 gnomAD: <http://gnomad.broadinstitute.org>

455 Human Genome Variation: <http://www.hgvs.org/mutnomen/>

456 Online Mendelian Inheritance in Man (OMIM): <http://www.omim.org/>

457

458

459 **References**

460

461 1. Dowling, J.J., Weihl, C.C., and Spencer, M.J. (2021). Molecular and cellular basis of  
462 genetically inherited skeletal muscle disorders. *Nat Rev Mol Cell Bio* 22, 713–732.  
463 10.1038/s41580-021-00389-z.

464 2. Au, Y. (2004). The muscle ultrastructure: a structural perspective of the sarcomere. *Cell Mol*  
465 *Life Sci Cmls* 61, 3016–3033. 10.1007/s00018-004-4282-x.

466 3. Lindskog, C., Linné, J., Fagerberg, L., Hallström, B.M., Sundberg, C.J., Lindholm, M., Huss,  
467 M., Kampf, C., Choi, H., Liem, D.A., et al. (2015). The human cardiac and skeletal muscle  
468 proteomes defined by transcriptomics and antibody-based profiling. *Bmc Genomics* 16, 475.  
469 10.1186/s12864-015-1686-y.

470 4. Sung, S.S., Brassington, A.-M.E., Grannatt, K., Whitby, F.G., Krakowiak, P.A., and Bamshad,  
471 M. (2003). Mutations in Genes Encoding Fast-Twitch Contractile Proteins Cause Distal  
472 Arthrogryposis Syndromes. *Am J Hum Genetics* 72, 681–690. 10.1086/368294.

473 5. Sung, S.S., Brassington, A.-M.E., Krakowiak, P.A., and Bamshad, M. (2003). Mutations in  
474 TNNT3 cause multiple congenital contractures: a second locus for distal arthrogryposis type 2B.  
475 *Am J Hum Genetics* 73, 212–214. 10.1086/376418.

476 6. Toydemir, R.M., Rutherford, A., Whitby, F.G., Jorde, L.B., Carey, J.C., and Bamshad, M.J.  
477 (2006). Mutations in embryonic myosin heavy chain (MYH3) cause Freeman-Sheldon syndrome  
478 and Sheldon-Hall syndrome. *Nat Genet* 38, 561–565. 10.1038/ng1775.

479 7. Toydemir, R.M., Chen, H., Proud, V.K., Bokhoven, H. van, Hamel, B.C.J., Tuerlings, J.H.,  
480 Stratakis, C.A., and Bamshad, M.J. (2006). Trismus-pseudocamptodactyly syndrome is caused  
481 by recurrent mutation of MYH8. *Am J Med Genet A* 140A, 2387–2393. 10.1002/ajmg.a.31495.

482 8. Bamshad, M., Jorde, L.B., and Carey, J.C. (1996). A revised and extended classification of the  
483 distal arthrogryposes. *Am. J. Med. Genet.* 65, 277–281. 10.1002/(sici)1096-  
484 8628(19961111)65:4<277::aid-ajmg6>3.0.co;2-m.

485 9. Racca, A.W., Beck, A.E., McMillin, M.J., Korte, F.S., Bamshad, M.J., and Regnier, M.  
486 (2015). The embryonic myosin R672C mutation that underlies Freeman-Sheldon syndrome  
487 impairs cross-bridge detachment and cycling in adult skeletal muscle. *Hum Mol Genet* 24, 3348–  
488 3358. 10.1093/hmg/ddv084.

489 10. Mcmillin, M.J., Beck, A.E., Chong, J.X., Shively, K.M., Buckingham, K.J., Aracena, M.I.,  
490 Aylsworth, A.S., Bitoun, P., Clericuzio, C.L., Crow, Y.J., et al. (2014). Mutations in PIEZO2  
491 cause Gordon syndrome, Marden-Walker syndrome, and distal arthrogryposis type 5. *Am J Hum*  
492 *Genetics* 94, 734–744. 10.1016/j.ajhg.2014.03.015.

- 493 11. Coste, B., Houge, G., Murray, M.F., Stitzel, N., Bandell, M., Giovanni, M.A., Philippakis,  
494 A., Hoischen, A., Riemer, G., Steen, U., et al. (2013). Gain-of-function mutations in the  
495 mechanically activated ion channel PIEZO2 cause a subtype of Distal Arthrogyrosis. *Proc*  
496 *National Acad Sci* *110*, 4667–4672. 10.1073/pnas.1221400110.
- 497 12. Mcmillin, M.J., Below, J.E., Shively, K.M., Beck, A.E., Gildersleeve, H.I., Pinner, J.,  
498 Gogola, G.R., Hecht, J.T., Grange, D.K., Harris, D.J., et al. (2013). Mutations in ECEL1 Cause  
499 Distal Arthrogyrosis Type 5D. *Am J Hum Genetics* *92*, 150–156. 10.1016/j.ajhg.2012.11.014.
- 500 13. Dieterich, K., Quijano-Roy, S., Monnier, N., Zhou, J., Fauré, J., Smirnow, D.A., Carlier, R.,  
501 Laroche, C., Marcotelles, P., Mercier, S., et al. (2013). The neuronal endopeptidase ECEL1 is  
502 associated with a distinct form of recessive distal arthrogyrosis. *Hum Mol Genet* *22*, 1483–  
503 1492. 10.1093/hmg/dd514.
- 504 14. Putnam, E.A., Zhang, H., Ramirez, F., and Milewicz, D.M. (1995). Fibrillin–2 (FBN2)  
505 mutations result in the Marfan–like disorder, congenital contractural arachnodactyly. *Nat Genet*  
506 *11*, 456–458. 10.1038/ng1295-456.
- 507 15. Chong, J.X., Talbot, J.C., Teets, E.M., Previs, S., Martin, B.L., Shively, K.M., Marvin, C.T.,  
508 Aylsworth, A.S., Saadeh-Haddad, R., Schatz, U.A., et al. (2020). Mutations in MYLPF Cause a  
509 Novel Segmental Amyoplasia that Manifests as Distal Arthrogyrosis. *Am J Hum Genetics* *107*,  
510 293–310. 10.1016/j.ajhg.2020.06.014.
- 511 16. McLaren, W., Gil, L., Hunt, S.E., Riat, H.S., Ritchie, G.R.S., Thormann, A., Flicek, P., and  
512 Cunningham, F. (2016). The Ensembl Variant Effect Predictor. *Genome Biol* *17*, 122.  
513 10.1186/s13059-016-0974-4.
- 514 17. Paila, U., Chapman, B.A., Kirchner, R., and Quinlan, A.R. (2013). GEMINI: integrative  
515 exploration of genetic variation and genome annotations. *Plos Comput Biol* *9*, e1003153.  
516 10.1371/journal.pcbi.1003153.
- 517 18. Karczewski, K.J., Francioli, L.C., Tiao, G., Cummings, B.B., Alföldi, J., Wang, Q., Collins,  
518 R.L., Laricchia, K.M., Ganna, A., Birnbaum, D.P., et al. (2020). The mutational constraint  
519 spectrum quantified from variation in 141,456 humans. *Nature* *581*, 434–443. 10.1038/s41586-  
520 020-2308-7.
- 521 19. Berman, H.M., Westbrook, J., Feng, Z., Gilliland, G., Bhat, T.N., Weissig, H., Shindyalov,  
522 I.N., and Bourne, P.E. (2000). The Protein Data Bank. *Nucleic Acids Res* *28*, 235–242.  
523 10.1093/nar/28.1.235.
- 524 20. Bateman, A., Martin, M.J., O’Donovan, C., Magrane, M., Alpi, E., Antunes, R., Bely, B.,  
525 Bingley, M., Bonilla, C., Britto, R., et al. (2017). UniProt: the universal protein knowledgebase.  
526 *Nucleic Acids Res* *45*, D158–D169. 10.1093/nar/gkw1099.
- 527 21. Sievers, F., Wilm, A., Dineen, D., Gibson, T.J., Karplus, K., Li, W., Lopez, R., McWilliam,  
528 H., Remmert, M., Söding, J., et al. (2011). Fast, scalable generation of high-quality protein

- 529 multiple sequence alignments using Clustal Omega. *Mol Syst Biol* 7, 539–539.  
530 10.1038/msb.2011.75.
- 531 22. Fiser, A., and Šali, A. (2003). Modeller: Generation and Refinement of Homology-Based  
532 Protein Structure Models. *Methods Enzymol* 374, 461–491. 10.1016/s0076-6879(03)74020-8.
- 533 23. Ecken, J. von der, Müller, M., Lehman, W., Manstein, D.J., Penczek, P.A., and Raunser, S.  
534 (2015). Structure of the F-actin–tropomyosin complex. *Nature* 519, 114–117.  
535 10.1038/nature14033.
- 536 24. Case, D.A., Aktulga, H.M., Belfon, K., Ben-Shalom, I.Y., Brozell, S.R., Cerutti, D.S.,  
537 Cheatham, T.E., III, Cisneros, G.A., Cruzeiro, V.W.D., et al. Amber 2021. Amber 2021.  
538 <https://ambermd.org/doc12/Amber21.pdf>.
- 539 25. Case, D.A., Cheatham, T.E., Darden, T., Gohlke, H., Luo, R., Merz, K.M., Onufriev, A.,  
540 Simmerling, C., Wang, B., and Woods, R.J. (2005). The Amber biomolecular simulation  
541 programs. *J Comput Chem* 26, 1668–1688. 10.1002/jcc.20290.
- 542 26. Maier, J.A., Martinez, C., Kasavajhala, K., Wickstrom, L., Hauser, K.E., and Simmerling, C.  
543 (2015). ff14SB: Improving the Accuracy of Protein Side Chain and Backbone Parameters from  
544 ff99SB. *J Chem Theory Comput* 11, 3696–3713. 10.1021/acs.jctc.5b00255.
- 545 27. Jorgensen, W.L., Chandrasekhar, J., Madura, J.D., Impey, R.W., and Klein, M.L. (1983).  
546 Comparison of simple potential functions for simulating liquid water. *J Chem Phys* 79, 926–935.  
547 10.1063/1.445869.
- 548 28. Li, P., Song, L.F., and Merz, K.M. (2015). Systematic Parameterization of Monovalent Ions  
549 Employing the Nonbonded Model. *J Chem Theory Comput* 11, 1645–1657. 10.1021/ct500918t.
- 550 29. Li, P., Song, L.F., and Merz, K.M. (2015). Parameterization of Highly Charged Metal Ions  
551 Using the 12-6-4 LJ-Type Nonbonded Model in Explicit Water. *J Phys Chem B* 119, 883–895.  
552 10.1021/jp505875v.
- 553 30. Li, P., and Merz, K.M. (2014). Taking into Account the Ion-Induced Dipole Interaction in the  
554 Nonbonded Model of Ions. *J Chem Theory Comput* 10, 289–297. 10.1021/ct400751u.
- 555 31. Meagher, K.L., Redman, L.T., and Carlson, H.A. (2003). Development of polyphosphate  
556 parameters for use with the AMBER force field. *J Comput Chem* 24, 1016–1025.  
557 10.1002/jcc.10262.
- 558 32. Miao, Y., Feher, V.A., and McCammon, J.A. (2015). Gaussian Accelerated Molecular  
559 Dynamics: Unconstrained Enhanced Sampling and Free Energy Calculation. *J Chem Theory*  
560 *Comput* 11, 3584–3595. 10.1021/acs.jctc.5b00436.

- 561 33. Roe, D.R., and Cheatham, T.E. (2013). PTRAJ and CPPTRAJ: Software for Processing and  
562 Analysis of Molecular Dynamics Trajectory Data. *J Chem Theory Comput* 9, 3084–3095.  
563 10.1021/ct400341p.
- 564 34. Pettersen, E.F., Goddard, T.D., Huang, C.C., Couch, G.S., Greenblatt, D.M., Meng, E.C., and  
565 Ferrin, T.E. (2004). UCSF Chimera--a visualization system for exploratory research and  
566 analysis. *J Comput Chem* 25, 1605–1612. 10.1002/jcc.20084.
- 567 35. Sanner, M.F., Olson, A.J., and Spehner, J. (1996). Reduced surface: An efficient way to  
568 compute molecular surfaces. *Biopolymers* 38, 305–320. 10.1002/(sici)1097-  
569 0282(199603)38:3<305::aid-bip4>3.0.co;2-y.
- 570 36. Chong, J.X., Burrage, L.C., Beck, A.E., Marvin, C.T., Bacino, C.A., Jain, M., Alanay, Y.,  
571 Berry, S.A., Carey, J.C., Gibbs, R.A., et al. (2015). Autosomal-Dominant Multiple Pterygium  
572 Syndrome Is Caused by Mutations in MYH3. *Am J Hum Genetics* 96, 841–849.  
573 10.1016/j.ajhg.2015.04.004.
- 574 37. Rentzsch, P., Schubach, M., Shendure, J., and Kircher, M. (2021). CADD-Splice—  
575 improving genome-wide variant effect prediction using deep learning-derived splice scores.  
576 *Genome Med* 13, 31. 10.1186/s13073-021-00835-9.
- 577 38. Agrawal, P.B., Strickland, C.D., Midgett, C., Morales, A., Newburger, D.E., Poulos, M.A.,  
578 Tomczak, K.K., Ryan, M.M., Iannaccone, S.T., Crawford, T.O., et al. (2004). Heterogeneity of  
579 nemaline myopathy cases with skeletal muscle alpha-actin gene mutations. *Ann Neurol* 56, 86–  
580 96. 10.1002/ana.20157.
- 581 39. Laing, N.G., Dye, D.E., Wallgren-Pettersson, C., Richard, G., Monnier, N., Lillis, S.,  
582 Winder, T.L., Lochmüller, H., Graziano, C., Mitrani-Rosenbaum, S., et al. (2009). Mutations and  
583 polymorphisms of the skeletal muscle alpha-actin gene (ACTA1). *Hum Mutat* 30, 1267–1277.  
584 10.1002/humu.21059.
- 585 40. Sparrow, J.C., Nowak, K.J., Durling, H.J., Beggs, A.H., Wallgren-Pettersson, C., Romero,  
586 N., Nonaka, I., and Laing, N.G. (2003). Muscle disease caused by mutations in the skeletal  
587 muscle alpha-actin gene (ACTA1). *Neuromuscular Disord* 13, 519–531. 10.1016/s0960-  
588 8966(03)00101-9.
- 589 41. Ilkovski, B., Nowak, K.J., Domazetovska, A., Maxwell, A.L., Clement, S., Davies, K.E.,  
590 Laing, N.G., North, K.N., and Cooper, S.T. (2004). Evidence for a dominant-negative effect in  
591 ACTA1 nemaline myopathy caused by abnormal folding, aggregation and altered polymerization  
592 of mutant actin isoforms. *Hum Mol Genet* 13, 1727–1743. 10.1093/hmg/ddh185.
- 593 42. Ilkovski, B., Cooper, S.T., Nowak, K., Ryan, M.M., Yang, N., Schnell, C., Durling, H.J.,  
594 Roddick, L.G., Wilkinson, I., Kornberg, A.J., et al. (2001). Nemaline myopathy caused by  
595 mutations in the muscle alpha-skeletal-actin gene. *Am J Hum Genetics* 68, 1333–1343.  
596 10.1086/320605.



- 597 43. Nowak, K.J., Wattanasirichaigoon, D., Goebel, H.H., Wilce, M., Pelin, K., Donner, K.,  
598 Jacob, R.L., Hübner, C., Oexle, K., Anderson, J.R., et al. (1999). Mutations in the skeletal  
599 muscle alpha-actin gene in patients with actin myopathy and nemaline myopathy. *Nat Genet* 23,  
600 208–212. 10.1038/13837.
- 601 44. Matsson, H., Eason, J., Bookwalter, C.S., Klar, J., Gustavsson, P., Sunnegardh, J., Enell, H.,  
602 Jonzon, A., Vikkula, M., Gutierrez, I., et al. (2007). Alpha-cardiac actin mutations produce atrial  
603 septal defects. *Hum Mol Genet* 17, 256–265. 10.1093/hmg/ddm302.
- 604 45. Olson, T.M., Michels, V.V., Thibodeau, S.N., Tai, Y.-S., and Keating, M.T. (1998). Actin  
605 Mutations in Dilated Cardiomyopathy, a Heritable Form of Heart Failure. *Science* 280, 750–752.  
606 10.1126/science.280.5364.750.
- 607 46. Mogensen, J., Klausen, I.C., Pedersen, A.K., Egeblad, H., Bross, P., Kruse, T.A., Gregersen,  
608 N., Hansen, P.S., Baandrup, U., and Børglum, A.D. (1999).  $\alpha$ -cardiac actin is a novel disease  
609 gene in familial hypertrophic cardiomyopathy. *J Clin Invest* 103, R39–R43. 10.1172/jci6460.
- 610 47. Monserrat, L., Hermida-Prieto, M., Fernandez, X., Rodriguez, I., Dumont, C., Cazon, L.,  
611 Cuesta, M.G., Gonzalez-Juanatey, C., Peteiro, J., Alvarez, N., et al. (2007). Mutation in the  
612 alpha-cardiac actin gene associated with apical hypertrophic cardiomyopathy, left ventricular  
613 non-compaction, and septal defects. *Eur Heart J* 28, 1953–1961. 10.1093/eurheartj/ehm239.
- 614 48. Hocky, G.M., Baker, J.L., Bradley, M.J., Sinitskiy, A.V., Cruz, E.M.D.L., and Voth, G.A.  
615 (2016). Cations Stiffen Actin Filaments by Adhering a Key Structural Element to Adjacent  
616 Subunits. *J Phys Chem B* 120, 4558–4567. 10.1021/acs.jpccb.6b02741.
- 617 49. Chan, C., Fan, J., Messer, A.E., Marston, S.B., Iwamoto, H., and Ochala, J. (2016).  
618 Myopathy-inducing mutation H40Y in ACTA1 hampers actin filament structure and function.  
619 *Biochim Biophys Acta* 1862, 1453–1458. 10.1016/j.bbadis.2016.04.013.
- 620 50. Racca, A.W., Beck, A.E., Bamshad, M.J., and Regnier, M. (2014). Prolonged Relaxation  
621 Kinetics in Distal Arthrogryposis Skeletal Muscle Myofibrils with a MYH3 R672C Mutation  
622 (*Biophysical Journal*) 10.1016/j.bpj.2013.11.4233.
- 623 51. Robinson, P., Lipscomb, S., Preston, L.C., Altin, E., Watkins, H., Ashley, C.C., and  
624 Redwood, C.S. (2007). Mutations in fast skeletal troponin I, troponin T, and  $\beta$ -tropomyosin that  
625 cause distal arthrogryposis all increase contractile function. *Faseb J* 21, 896–905. 10.1096/fj.06-  
626 6899com.
- 627 52. Ha, K., Buchan, J.G., Alvarado, D.M., Mccall, K., Vydyanath, A., Luther, P.K., Goldsmith,  
628 M.I., Dobbs, M.B., and Gurnett, C.A. (2013). MYBPC1 mutations impair skeletal muscle  
629 function in zebrafish models of arthrogryposis. *Hum Mol Genet* 22, 4967–4977.  
630 10.1093/hmg/ddt344.
- 631 53. Vandekerckhove, J., Bugaisky, G., and Buckingham, M. (1986). Simultaneous expression of  
632 skeletal muscle and heart actin proteins in various striated muscle tissues and cells. A

- 633 quantitative determination of the two actin isoforms. *J Biol Chem* 261, 1838–1843.  
634 10.1016/s0021-9258(17)36017-9.
- 635 54. Tondeleir, D., Vandamme, D., Vandekerckhove, J., Ampe, C., and Lambrechts, A. (2009).  
636 Actin isoform expression patterns during mammalian development and in pathology: Insights  
637 from mouse models. *Cell Motil Cytoskel* 66, 798–815. 10.1002/cm.20350.
- 638 55. Ilkovski, B., Clement, S., Sewry, C., North, K.N., and Cooper, S.T. (2005). Defining  $\alpha$ -  
639 skeletal and  $\alpha$ -cardiac actin expression in human heart and skeletal muscle explains the absence  
640 of cardiac involvement in ACTA1 nemaline myopathy. *Neuromuscular Disord* 15, 829–835.  
641 10.1016/j.nmd.2005.08.004.
- 642 56. Abdul-Hussein, S., Ven, P.F.M. van der, and Tajsharghi, H. (2012). Expression profiles of  
643 muscle disease-associated genes and their isoforms during differentiation of cultured human  
644 skeletal muscle cells. *Bmc Musculoskelet Di* 13, 262–262. 10.1186/1471-2474-13-262.
- 645 57. Matsumoto, A., Tsuda, H., Furui, S., Kawada□Nagashima, M., Anzai, T., Seki, M.,  
646 Watanabe, K., Muramatsu, K., Osaka, H., Iwamoto, S., et al. (2022). A case of congenital  
647 fiber□type disproportion syndrome presenting dilated cardiomyopathy with ACTA1 mutation.  
648 *Mol Genetics Genom Medicine*, e2008. 10.1002/mgg3.2008.
- 649 58. Tadokoro, K., Ohta, Y., Sasaki, R., Takahashi, Y., Sato, K., Shang, J., Takemoto, M.,  
650 Hishikawa, N., Yamashita, T., Nakamura, K., et al. (2018). Congenital myopathy with fiber-type  
651 disproportion accompanied by dilated cardiomyopathy in a patient with a novel p.G48A ACTA1  
652 mutation. *J Neurol Sci* 393, 142–144. 10.1016/j.jns.2018.08.015.
- 653 59. Carnevale, A., Rosas□Madrigal, S., Rosendo□Gutiérrez, R., López□Mora, E.,  
654 Romero□Hidalgo, S., Avila□Vazzini, N., Jacobo□Albavera, L., Domínguez□Pérez, M.,  
655 Vargas□Alarcón, G., Pérez□Villatoro, F., et al. (2020). Genomic study of dilated  
656 cardiomyopathy in a group of Mexican patients using site□directed next generation sequencing.  
657 *Mol Genetics Genom Medicine* 8, e1504. 10.1002/mgg3.1504.
- 658 60. Kim, S.-Y., Park, Y.-E., Kim, H.-S., Lee, C.-H., Yang, D.H., and Kim, D.-S. (2011).  
659 Nemaline myopathy and non-fatal hypertrophic cardiomyopathy caused by a novel ACTA1  
660 E239K mutation. *J Neurol Sci* 307, 171–173. 10.1016/j.jns.2011.04.022.
- 661 61. Reza, N., Garg, A., Merrill, S.L., Chowns, J.L., Rao, S., and Owens, A.T. (2018). ACTA1  
662 Novel Likely Pathogenic Variant in a Family With Dilated Cardiomyopathy. *Circulation Genom*  
663 *Precis Medicine* 11, e002243. 10.1161/circgen.118.002243.
- 664 62. Kaindl, A.M., Rüschemdorf, F., Krause, S., Goebel, H.-H., Koehler, K., Becker, C., Pongratz,  
665 D., Müller-Höcker, J., Nürnberg, P., Stoltenburg-Didinger, G., et al. (2004). Missense mutations  
666 of ACTA1 cause dominant congenital myopathy with cores. *J Med Genet* 41, 842.  
667 10.1136/jmg.2004.020271.



- 668 63. D'Amico, A., Graziano, C., Pacileo, G., Petrini, S., Nowak, K.J., Boldrini, R., Jacques, A.,  
669 Feng, J.-J., Porfirio, B., Sewry, C.A., et al. (2006). Fatal hypertrophic cardiomyopathy and  
670 nemaline myopathy associated with ACTA1 K336E mutation. *Neuromuscular Disord* 16, 548–  
671 552. 10.1016/j.nmd.2006.07.005.
- 672 64. Gatayama, R., Ueno, K., Nakamura, H., Yanagi, S., Ueda, H., Yamagishi, H., and Yasui, S.  
673 (2013). Nemaline Myopathy With Dilated Cardiomyopathy in Childhood. *Pediatrics* 131, e1986–  
674 e1990. 10.1542/peds.2012-1139.
- 675 65. Yokoyama, S., Koide, A., Nishino, I., Hayashi, Y., Ohki, H., Miura, M., and Shibuya, K.  
676 (2016). Hypertrophic cardiomyopathy associated with nemaline myopathy due to ACTA1  
677 mutation. *Pediatric Cardiol Cardiac Surg* 2, 181–186. 10.9794/jspccs.32.181.
- 678  
679  
680

681 **Figures**

682

683 **Figure 1. Phenotypic Characteristics of Individuals with Distal Arthrogryposis due to**  
684 **heterozygous variants in *ACTC1*.** [Photo is redacted for Medrxiv submission.](#) Characteristics  
685 shown include: webbed neck, bilateral clubfoot, camptodactyly of the fingers and hypoplastic  
686 flexion creases in Family A (II-1 and III-1); camptodactyly, webbed neck, bilateral clubfoot,  
687 camptodactyly of the fingers and toes and hypoplastic flexion creases in Family B (II-2 and III-  
688 1); webbed neck, bilateral clubfoot, webbed neck, bilateral clubfoot, camptodactyly of the fingers  
689 and toes in Family C (II-2); and ptosis, webbed neck, camptodactyly of the fingers, and scoliosis  
690 in Family D (II-1). Table 1 contains a detailed description of the clinical findings of each affected  
691 individual and Figure S1 provides a pedigree for each family.

692

693 **Figure 2. Genomic Model of *ACTC1* and *ACTA1*.** Illustrated are each of the variants found in  
694 *ACTC1* that underlie distal arthrogryposis and the homologous sites in *ACTA1* that result in  
695 severe nemaline myopathy when mutated. *ACTC1* and *ACTA1* are each composed of 7 exons  
696 and consist of protein-coding (blue) and non-coding (orange) sequence. The proteins are nearly  
697 identical except for four residues (represented by single-letter amino acid codes immediately  
698 above and below the green line). The approximate location of each pathogenic variant (red text)  
699 is indicated by an arrow.

700

701 **Figure 3. Molecular structures of the globular and filamentous forms of human cardiac**  
702 **actin.** (A) Globular (g-) actin monomers are comprised of four subdomains (subdomain 1-4,  
703 SD1-4) arranged around the nucleotide binding pocket. The g-actin monomer simulated in this  
704 study contains ATP in the binding pocket. The atoms of four residues corresponding to mutation  
705 sites examined in this study are shown as spheres: T68 (orange), R185 (magenta), G199  
706 (purple), and R374 (blue). (B) Actin monomers polymerize into protofibrils, which then associate

707 with one another to form filamentous (f-) actin. In this f-actin pentamer, chains A, C and E form  
708 one protofibril and chains B and D form the other. The pentamer simulated here has ADP  
709 molecules in the nucleotide binding pockets. The location of residue T68 is denoted on chain C.

710

711 **Figure 4. p.Thr68Asn alters the structure and dynamics of g-actin subdomain 2.**

712 Comparison of representative MD-derived snapshots of WT (A) and p.Thr68Asn (B) g-actin  
713 highlights the structural and dynamical changes induced by p.Thr68Asn (red ribbon). Sidechain  
714 atoms of relevant residues are shown and annotated. (C) Bar heights correspond to the fraction  
715 of time that select residue pairs spent in contact with one another, averaged over triplicate  
716 simulations (error bars correspond to st. dev.). p.Thr68Asn (orange bars) led to shifts in several  
717 amino acid interactions relative to WT (black bars). Statistically significant differences between  
718 the WT and p.Thr68Asn contact frequencies are denoted (ns: not significant, \*:  $p \leq 0.05$ , \*\*:  $p \leq$   
719 0.01) (D) p.Thr68Asn (orange) increased the  $\alpha$ -helix secondary structure content of residues 40-  
720 50 within the D-loop relative to WT (black). (E) The p.Thr68Asn mutation (orange) led to a  
721 decrease in the solvent accessible surface area of D-loop residues (41-56) relative to WT  
722 (black). The histogram shows the SASA probability density of all replicate simulations  
723 combined.

724

725 **Figure 5. DA-associated mutations lead to structural changes within subdomain 2.** The

726 percent simulation time for which residue-residue contacts endured were compared between  
727 the four mutant simulations: p.Thr68Asn (A, orange), p.Arg185Trp (B, magenta), p.Gly199Ser  
728 (C, purple), p.Arg374Ser (D, blue) and the WT simulations (black). For each mutant-WT  
729 comparison, those residue-residue contacts that were present for statistically different  
730 percentages of the simulations have been mapped onto the reference crystal structure of g-  
731 actin. Contacts that were present more frequently in the WT simulations are denoted by black  
732 pipes and contacts present more frequently in the mutant simulations are colored orange,

733 magenta, purple, or blue. The thickness of the pipes corresponds to the difference in percent  
734 simulation time that the contact was present between the WT and mutant simulations (larger  
735 pipes indicate a contact was observed more frequently). Although the mutations were  
736 distributed throughout the structure, they all led to statistically significant (see Table S2 for test  
737 statistics) changes in the structure of subdomain 2 (orange ribbons).

738  
739 **Figure 6. p.Thr68Asn alters inter-chain interactions made by subdomain 2 in f-actin.**

740 Residue-residue interactions formed between SD2 of chain C and chains A and B were  
741 analyzed in the GaMD simulations of WT and p.Thr68Asn f-actin. (A) p.Thr68Asn led to  
742 statistically significant differences in residue-residue contacts formed by SD2 of chain C  
743 (denoted by pipes as in Figure 5). Differences were found in contacts formed between SD2 of  
744 chain C and SD1 of chain A, as well as in contacts formed between SD2 of chain C and the  
745 SD3-SD4 linker of chain B. (B) The total number of atom-atom interactions formed between  
746 SD2 of chain C and all atoms in chains A and B were monitored in the WT and p.Thr68Asn  
747 GaMD simulations. Relative to the WT simulation (black) the p.Thr68Asn simulation (orange)  
748 had fewer inter-chain contacts involving chain CSD2. (C) In the reference cryoEM structure and  
749 WT simulation, the D-loop of SD2 in chain C fits into a pocket formed by SD1 and SD3 of chain  
750 A. The p.Thr68Asn simulations instead sampled non-native conformations in which the D-loop  
751 exited this binding pocket. In the reference cryoEM structure and the WT simulation (D) the D-  
752 loop of chain C is stabilized via a network of hydrophobic interactions formed with Y171 of chain  
753 A as well as a hydrogen bond network involving Arg 41 (chain C), Thr 68 (chain C), and Glu 272  
754 (chain B). These interactions were disrupted in the p.Thr68Asn simulation (E).

755

756

757

758

759

760

761

762 **Tables**

763 **Table 1. Clinical findings of individuals with Distal Arthrogryposis due to heterozygous**

764 **variants in *ACTC1*.** Plus (+) indicates presence of a finding, minus (-) indicates absence of a

765 finding. \* = described per report. ND = no data were available. NA = not applicable. CADD =

766 Combined Annotation Dependent Depletion v1.6. cDNA positions named using HGVS notation

767 and RefSeq transcript NM\_005159.4. Predicted amino acid changes are shown. US =

768 Ultrasound.

769

770

771

| Family                                | A                                              | A                                              | B                     | B                     | C                        | C                   | D                                              | E                       |
|---------------------------------------|------------------------------------------------|------------------------------------------------|-----------------------|-----------------------|--------------------------|---------------------|------------------------------------------------|-------------------------|
| Ancestry                              | redacted for Medrxiv submission                |                                                |                       |                       |                          |                     |                                                |                         |
| Individual                            | II-1                                           | III-1                                          | II-2                  | III-1                 | II-2                     | III-1               | II-1                                           | II-1                    |
| Sex                                   | Male                                           | Female                                         | Female                | Female                | Female                   | Male                | Male                                           | Male                    |
| Age at last Assessment (years)        | 50s                                            | 16-20                                          | 50s                   | 20s                   | 20s                      | 0-5                 | 16-20                                          | stillbirth (early term) |
| <b>Variant</b>                        |                                                |                                                |                       |                       |                          |                     |                                                |                         |
| ClinGen Allele ID                     | CA391630889                                    | CA391630889                                    | CA391628517           | CA391628517           | CA391631962              | CA391631962         | CA013.9824                                     | CA391628507             |
| cDNA change (NM_005159.4)             | c.595G>A                                       | c.595G>A                                       | c.1120C>A             | c.1120C>A             | c.203C>A                 | c.203C>A            | c.553C>T                                       | c.1121G>A               |
| Genomic Coordinates (hg19)            | chr15:g.35084630C>T                            | chr15:g.35084630C>T                            | chr15:g.35082627G>T   | chr15:g.35082627G>T   | chr15:g.35085697G>T      | chr15:g.35085697G>T | chr15:g.35084672G>A                            | chr15:g.35082626C>T     |
| Predicted amino acid change           | p.Gly199Ser                                    | p.Gly199Ser                                    | p.Arg374Ser           | p.Arg374Ser           | p.Thr68Asn               | p.Thr68Asn          | p.Arg185Trp                                    | p.Arg374His             |
| Zygoty                                | het                                            | het                                            | het                   | het                   | het                      | het                 | het                                            | het                     |
| Inheritance                           | unknown                                        | inherited                                      | inherited             | inherited             | de novo                  | inherited           | de novo                                        | de novo                 |
| CADD score (v1.6)                     | 25.6                                           | 25.6                                           | 23.7                  | 23.7                  | 24.7                     | 24.7                | 27.9                                           | 25.5                    |
| Allele count (gnomAD v2.1.1 + v3.1.2) | 0                                              | 0                                              | 0                     | 0                     | 0                        | 0                   | 1                                              | 0                       |
| <b>Original diagnosis</b>             | autosomal dominant multiple pterygium syndrome | autosomal dominant multiple pterygium syndrome | Sheldon-Hall syndrome | Sheldon-Hall syndrome | Freeman-Sheldon syndrome | N.D.                | multiple pterygium syndrome and cardiomyopathy | -                       |
| <b>Clinical Features: Growth</b>      |                                                |                                                |                       |                       |                          |                     |                                                |                         |
| Weight %ile                           | 57 (72 kg)                                     | <1 (40 kg) -2.95 SDS                           | 78 (70 kg)            | <1 (37 kg)            | 2 (121 kg)               | 1 (13.6 kg)         | <3 (29 kg)                                     | 33 (3050 g)             |
| Height %ile                           | <1 (155 cm)                                    | <1 (134 cm) -4.86 SDS                          | <1 (147 cm)           | <1 (140 cm)           | 56 (163 cm)              | 4 (102cm)           | <3 (149 cm)                                    | NA                      |
| Short stature                         | HP:0004322                                     | +                                              | +                     | +                     | +                        | -                   | +                                              | +                       |
| <b>Clinical Features: Limbs</b>       |                                                |                                                |                       |                       |                          |                     |                                                |                         |
| Knee contractures                     | HP:0006380                                     | -                                              | +                     | +                     | +                        | -                   | N.D.                                           | +                       |
| Vertical talus                        | HP:0001838                                     | -                                              | +                     | -                     | -                        | -                   | N.D.                                           | +                       |
| Equinovarus/clubfoot                  | HP:0001762                                     | -                                              | +                     | + (bilateral)         | + (bilateral)            | +                   | N.D.                                           | +                       |
| Camptodactyly, toes                   | HP:0001836                                     | -                                              | -                     | +                     | +                        | +                   | N.D.                                           | +                       |
| Elbow contractures                    | HP:0002987                                     | +                                              | -                     | N.D.                  | -                        | -                   | +                                              | +                       |
| Webbed elbow                          | HP:0009760                                     | -                                              | -                     | N.D.                  | N.D.                     | -                   | +                                              | N.D.                    |
| Limited forearm supination            | HP:0006394                                     | +                                              | +                     | +                     | +                        | -                   | N.D.                                           | +                       |
| Contractures of wrists                | HP:0001239                                     | -                                              | -                     | +                     | +                        | -                   | N.D.                                           | +                       |
| Camptodactyly, fingers                | HP:0100490                                     | +                                              | +                     | +                     | +                        | +                   | +                                              | +                       |

|                                           |            |                                           |                             |                                                                      |                                                                                                                           |       |                                                                                                                                                         |                                                               |                                                                                                                             |
|-------------------------------------------|------------|-------------------------------------------|-----------------------------|----------------------------------------------------------------------|---------------------------------------------------------------------------------------------------------------------------|-------|---------------------------------------------------------------------------------------------------------------------------------------------------------|---------------------------------------------------------------|-----------------------------------------------------------------------------------------------------------------------------|
| Hypoplastic flexion creases               |            | +                                         | +                           | +                                                                    | +                                                                                                                         | +     | N.D.                                                                                                                                                    | +                                                             | +                                                                                                                           |
| <b>Clinical Features: Face &amp; Neck</b> |            |                                           |                             |                                                                      |                                                                                                                           |       |                                                                                                                                                         |                                                               |                                                                                                                             |
| Downslanting palpebral fissures           | HP:0000494 | +                                         | +                           | -                                                                    | -                                                                                                                         | +     | +                                                                                                                                                       | +                                                             | +                                                                                                                           |
| Ptosis                                    | HP:0000508 | +                                         | +                           | +                                                                    | +                                                                                                                         | +     | -                                                                                                                                                       | +                                                             | +                                                                                                                           |
| Downturned corners of the mouth           | HP:0002714 | +                                         | +                           | +                                                                    | +                                                                                                                         | +     | +                                                                                                                                                       | N.D.                                                          | N.D.                                                                                                                        |
| Microretrognathia                         | HP:0000308 | +                                         | +                           | +                                                                    | +                                                                                                                         | +     | N.D.                                                                                                                                                    | +                                                             | +                                                                                                                           |
| Long nasal bridge                         |            | +                                         | +                           | +                                                                    | +                                                                                                                         | +     | +                                                                                                                                                       | N.D.                                                          | +                                                                                                                           |
| Low-set ears                              | HP:0000369 | +                                         | +                           | +                                                                    | +                                                                                                                         | +     | +                                                                                                                                                       | N.D.                                                          | +                                                                                                                           |
| Limited neck rotation                     | HP:0005986 | +                                         | +                           | +                                                                    | +                                                                                                                         | +     | N.D.                                                                                                                                                    | +(congenital torticollis)                                     | +                                                                                                                           |
|                                           |            | no vertebral fusion                       | no vertebral fusion         |                                                                      |                                                                                                                           |       |                                                                                                                                                         |                                                               |                                                                                                                             |
| Webbed neck                               | HP:0000465 | +mild                                     | +profound                   | +                                                                    | +                                                                                                                         | +     | +                                                                                                                                                       | N.D.                                                          | +                                                                                                                           |
| <b>Other</b>                              |            |                                           |                             |                                                                      |                                                                                                                           |       |                                                                                                                                                         |                                                               |                                                                                                                             |
| Scoliosis                                 | HP:0002650 |                                           |                             | +                                                                    |                                                                                                                           |       |                                                                                                                                                         | +                                                             | -                                                                                                                           |
|                                           |            | + mild                                    | +                           |                                                                      | +                                                                                                                         | N.D.  | -                                                                                                                                                       |                                                               |                                                                                                                             |
|                                           |            |                                           |                             | +                                                                    | restrictive lung disease (HP:0002091)                                                                                     |       |                                                                                                                                                         |                                                               |                                                                                                                             |
| Hip contractures                          | HP:0003273 | +                                         | +                           | +                                                                    | +                                                                                                                         | N.D.? | -                                                                                                                                                       | +                                                             | +                                                                                                                           |
| Cardiomyopathy                            | HP:0001638 | -                                         | -                           | N.D.                                                                 | N.D.                                                                                                                      | N.D.  | N.D.                                                                                                                                                    | +(dilatated)                                                  | -(fetal US)                                                                                                                 |
| Atrial septal defect                      | HP:0001631 | +                                         | +                           | N.D.                                                                 | N.D.                                                                                                                      | +     | +                                                                                                                                                       | +                                                             | -(fetal US)                                                                                                                 |
| Ventricular septal defect                 | HP:0001629 | -                                         | -                           | N.D.                                                                 | N.D.                                                                                                                      | N.D.  | -                                                                                                                                                       | +                                                             | -(fetal US)                                                                                                                 |
| <b>Other features</b>                     |            |                                           |                             |                                                                      |                                                                                                                           |       |                                                                                                                                                         |                                                               |                                                                                                                             |
|                                           |            | High myopia; glaucoma; retinal detachment | Mitral valve repair; myopia | bilateral fixed knee extension / limited knee extension (HP:0003066) | iris coloboma (HP:0000612) of the left eye; unilateral conductive hearing impairment (HP:0040119), childhood stapedectomy |       | non-verbal (HP:0001344); autism spectrum disorder (HP:0000729); widely-spaced nipples (HP:0006610); anteverted ears (HP:0040080); flat foot (HP:000176) | cryptorchidism, arachnoid cyst on base of skull, cleft palate | ductus venosus agenesis (HP:003419); hydrops fetalis (HP:000178); hydrothorax (HP:002567); mild polyhydramnios (HP:0001561) |

|  |  |    |  |  |
|--|--|----|--|--|
|  |  | 3) |  |  |
|--|--|----|--|--|



**Table 2. C<sub>α</sub> RMSD values for g-actin monomer simulations**

| <b>System</b>      | <b>Run 1</b> | <b>Run 2</b> | <b>Run 3</b> | <b>Average</b> |
|--------------------|--------------|--------------|--------------|----------------|
| <b>WT</b>          | 2.7          | 2.5          | 2.5          | <b>2.6</b>     |
| <b>p.Thr68Asn</b>  | 2.1          | 2.2          | 1.8          | <b>2.0</b>     |
| <b>p.Arg185Trp</b> | 2.4          | 2.5          | 2.3          | <b>2.4</b>     |
| <b>p.Gly199Ser</b> | 2.7          | 2.5          | 2.1          | <b>2.4</b>     |
| <b>p.Arg374Ser</b> | 2.4          | 2.2          | 2.1          | <b>2.2</b>     |

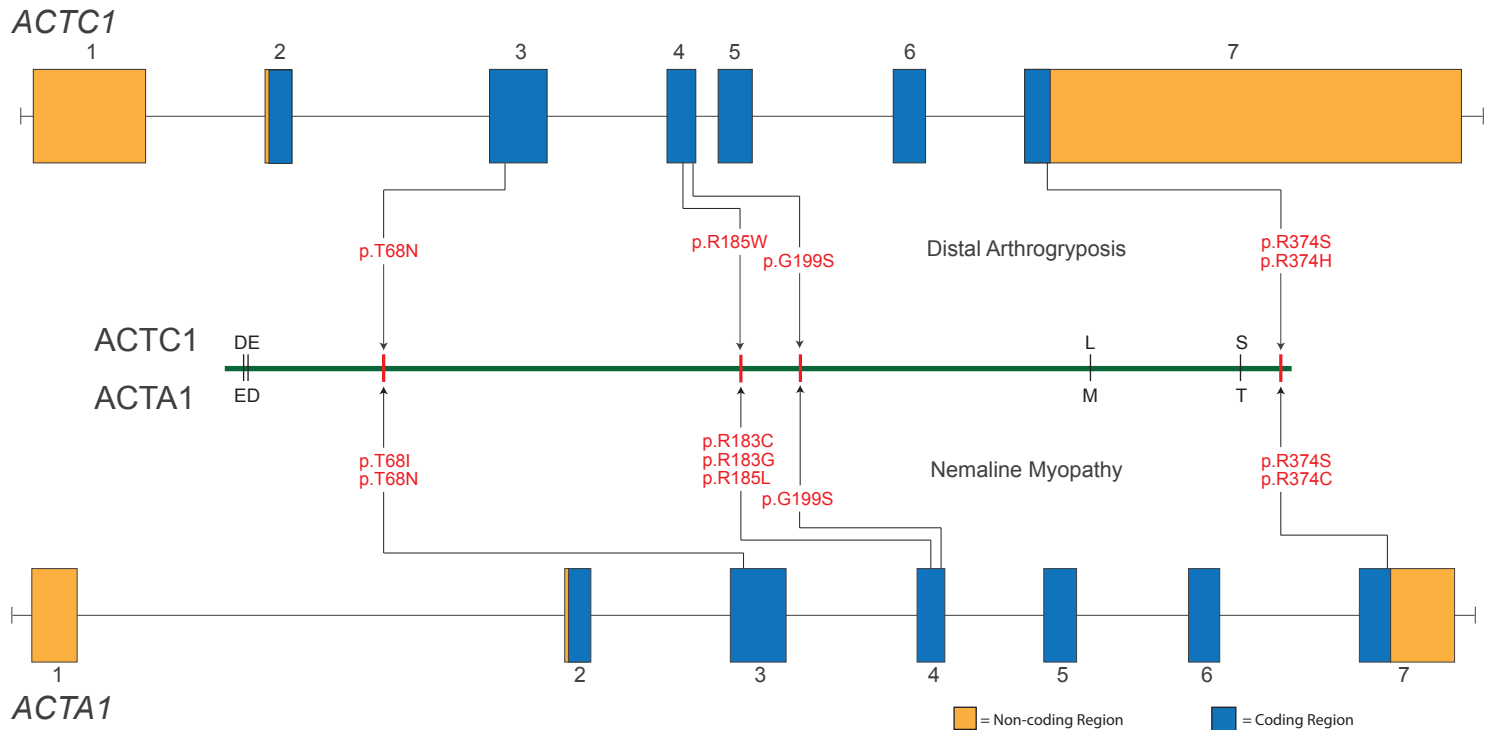

**a**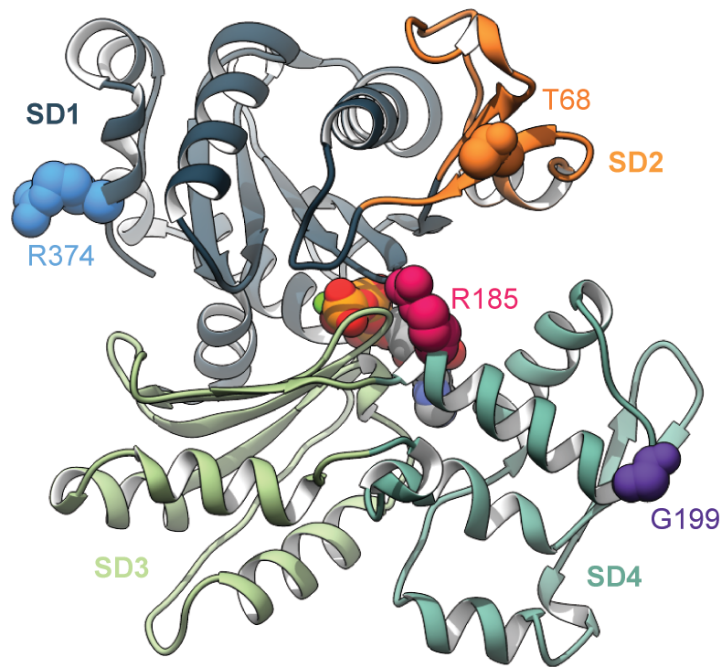**b**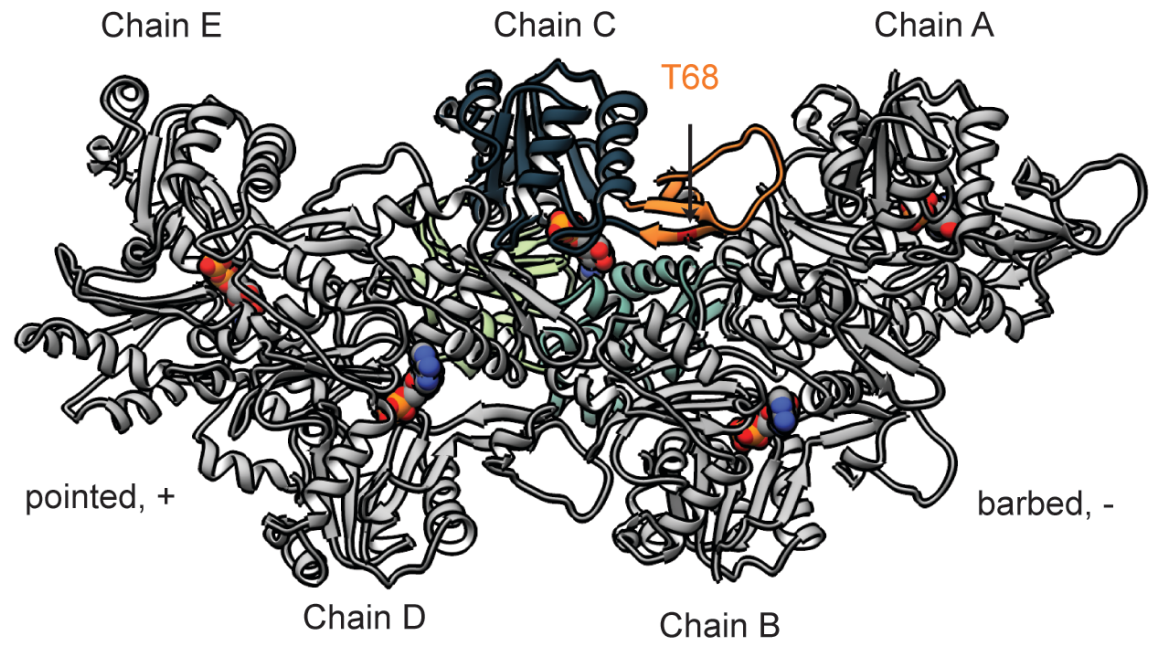

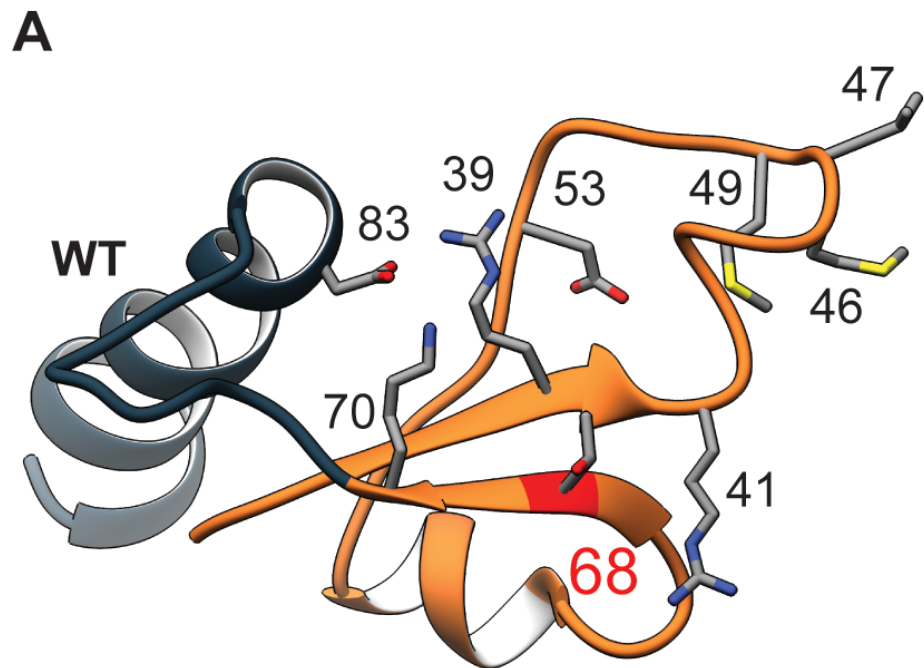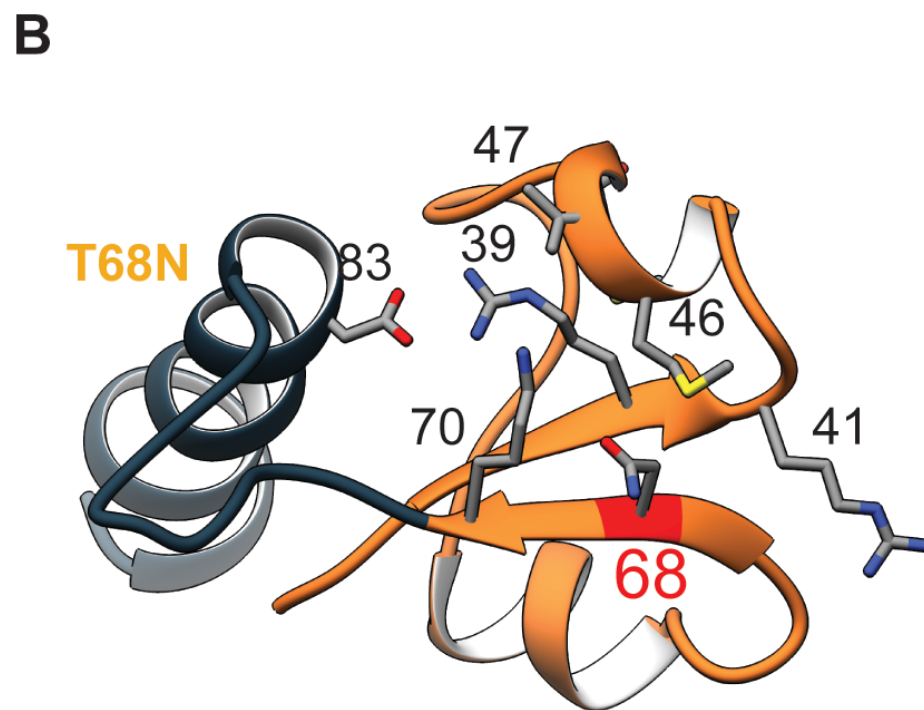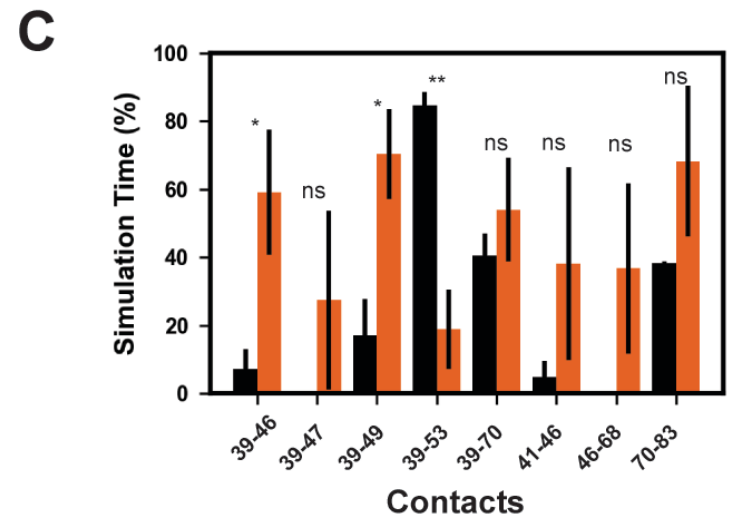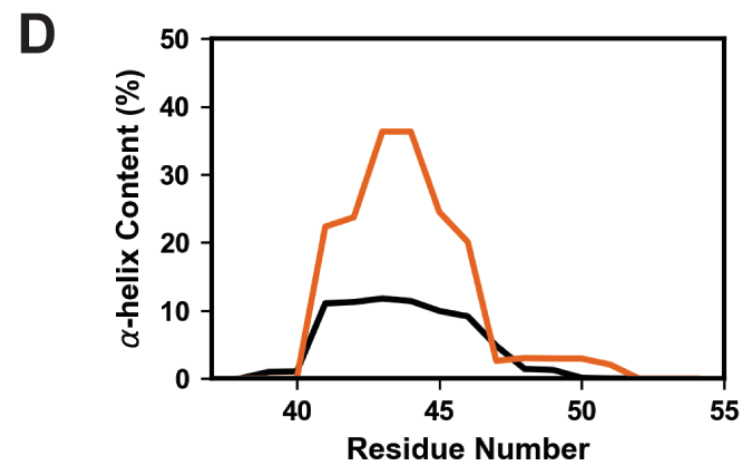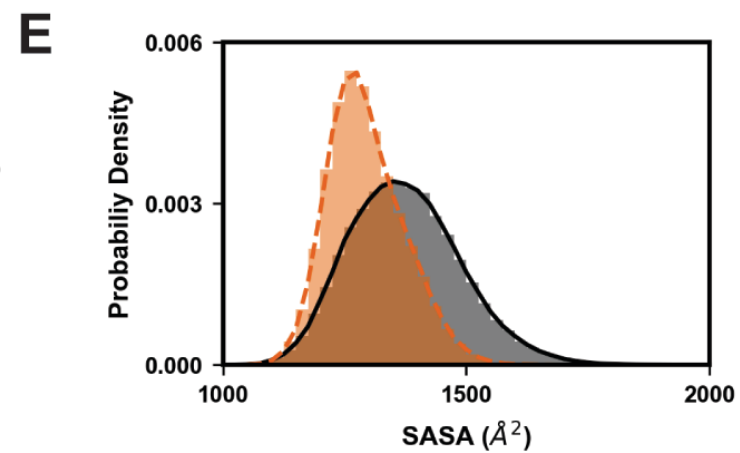

**A**

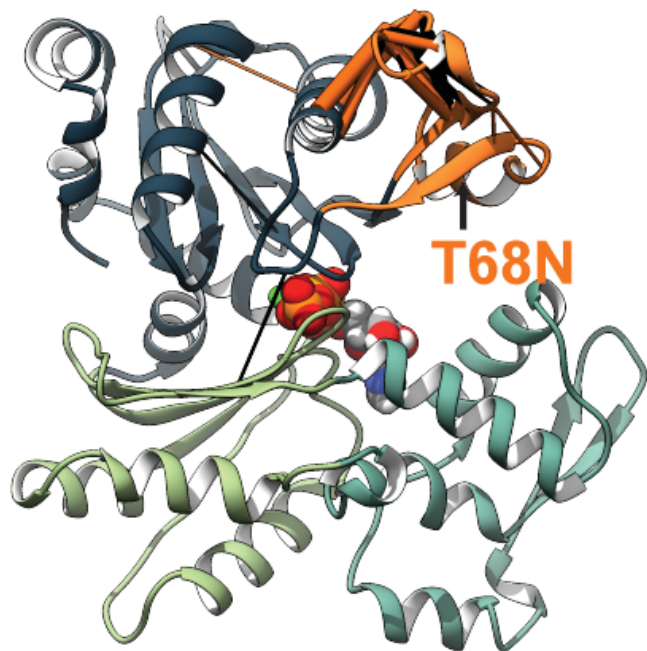

**B**

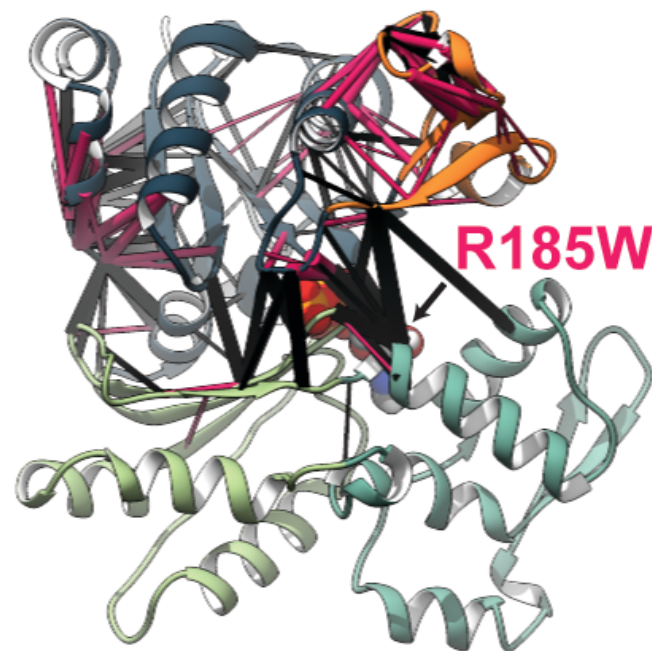

**C**

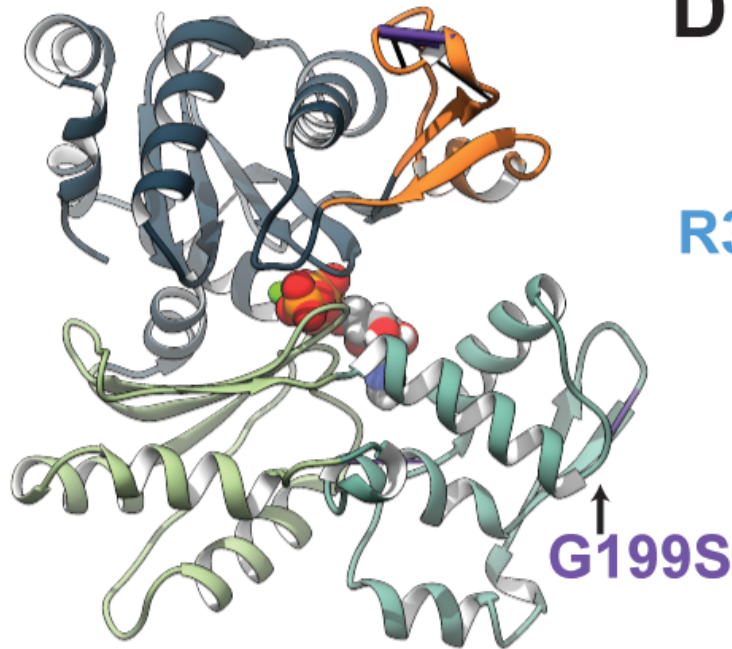

**D**

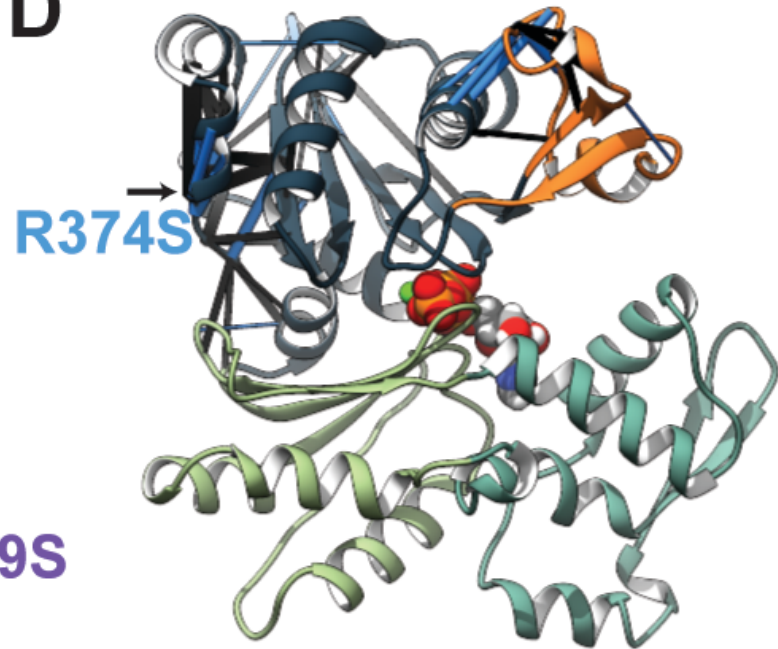



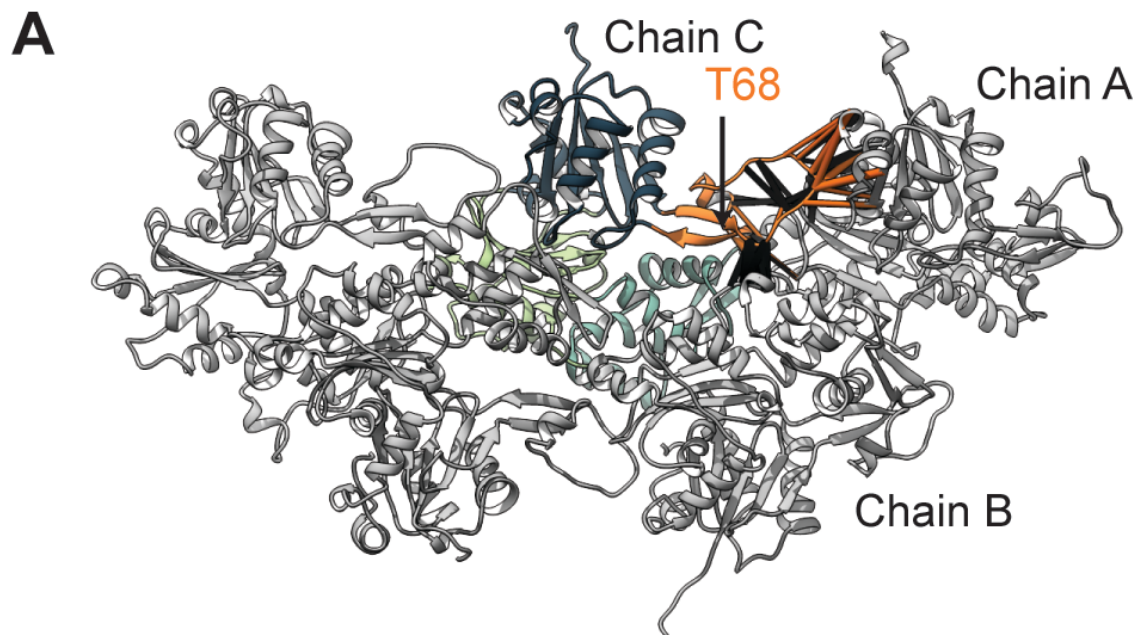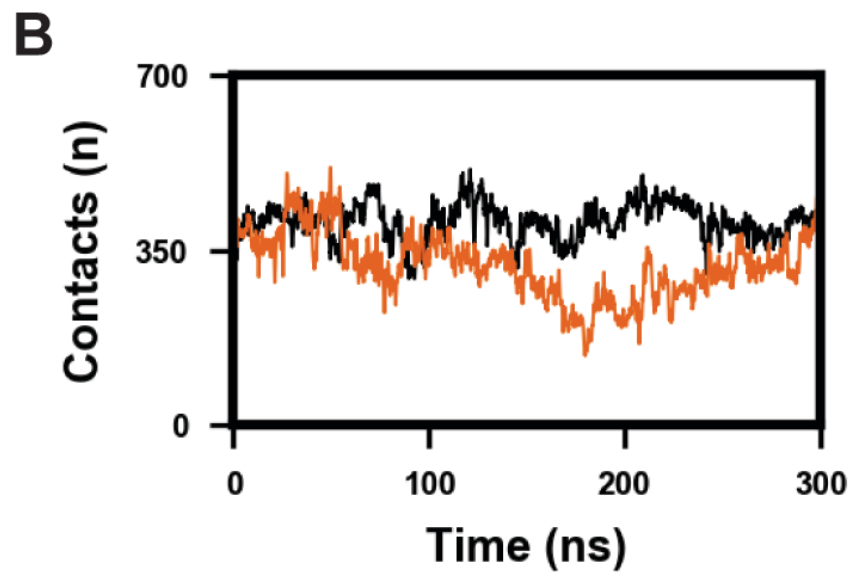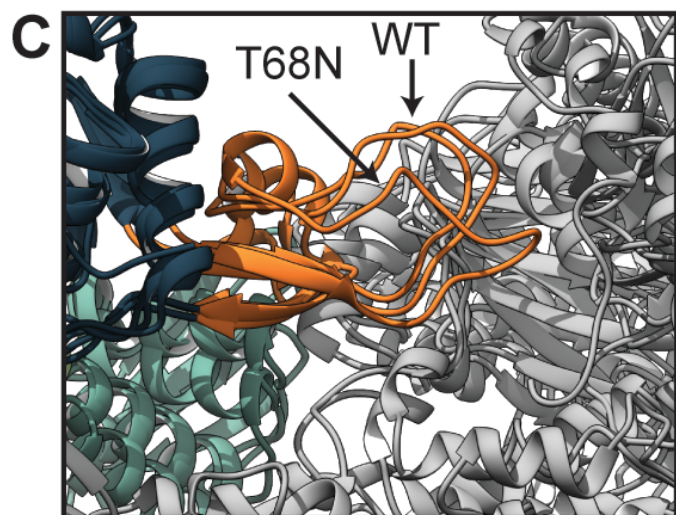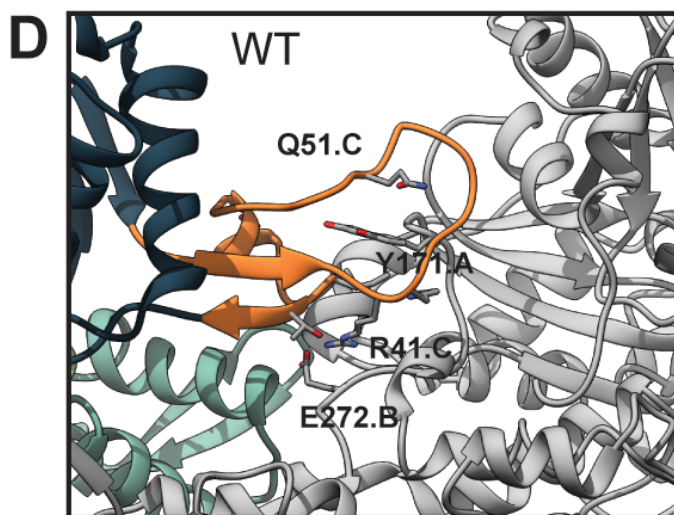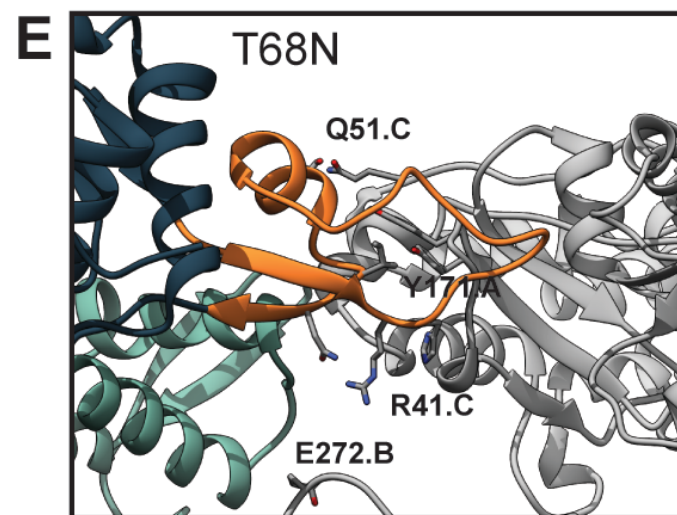

Source: https://medrxiv.org/content/10.1101/2023.03.07.23286862.full.pdf
